# Supplementary material for: Genome-wide identification and expression analysis of diacylglycerol acyltransferase genes in soybean ( Glycine max )
Source: PeerJ journal article supplement (doi:10.7717/peerj.14941), 2023-03-20
Supplement: DGAT.docx [file DGAT.docx]

Gene name Gene ID

DGAT1A Glyma.13G106100

>G.max Wm82.a4.v1|Glyma.13G106100.1
AGAAATCTGTTGTTTATTTTTTGGTGAAGAGAAGACTGAGTTAGTAAACACGCTCGCTCGGTCTTCTTTTCCAATGGCGATTTCCGATGAGCCTGAAACTGTAGCCACTGCTCTCAACCACTCTTCCCTGCGCCGCCGTCCCACCGCCGCTGGCCTCTTCAATTCGCCCGAGACGACCACCGACAGTTCCGGTGATGACTTGGCCAAGGATTCCGGTTCCGACGACTCCATCAGCAGCGACGCCGCCAATTCGCAACCGCAACAAAAACAAGACACTGATTTCTCCGTCCTCAAATTCGCCTACCGTCCTTCCGTCCCCGCTCATCGCAAAGTGAAGGAAAGTCCGCTCAGCTCCGACACCATTTTCCGTCAGTTGCAGAGTCACGCGGGCCTCTTCAACCTCTGTATAGTAGTCCTTGTTGCTGTGAATAGCCGACTCATCATTGAGAATTTAATGAAGTATGGTTGGTTGATCAAATCTGGCTTTTGGTTTAGCTCAAAGTCATTGAGAGACTGGCCCCTCTTCATGTGTTGTCTTTCTCTTGTGGTATTTCCTTTTGCTGCATTTATAGTGGAGAAGTTGGCACAGCAGAAGTGTATACCCGAACCAGTTGTTGTTGTACTTCATATAATCATTACCTCAGCTTCACTTTTCTATCCAGTTTTAGTAATTCTCAGGTGTGATTCTGCTTTTCTATCAGGTGTTACGTTAATGCTATTTGCTTGTGTTGTATGGTTAAAATTGGTGTCTTATGCACATACAAACTATGATATGAGAGCACTTACCAAATCAGTTGAAAAGGGAGAAGCTCTGCCCGATACTCTGAACATGGACTATCCTTACAATGTAAGCTTCAAGAGCTTAGCATATTTCCTGGTTGCCCCTACATTATGTTACCAGCCAAGCTATCCTCGCACACCTTATATTCGAAAGGGTTGGCTGTTTCGCCAACTTGTCAAGCTGATAATATTTACAGGAGTTATGGGATTTATAATAGAACAATACATTAATCCCATTGTACAAAATTCACAGCATCCTCTCAAGGGAAACCTTCTTTACGCCATCGAGAGAGTTCTGAAGCTTTCTGTTCCAAATTTATATGTGTGGCTCTGCATGTTCTATTGCTTTTTCCACCTTTGGTTAAATATATTGGCAGAGCTTCTTCGATTTGGTGATCGTGAATTCTACCAGGATTGGTGGAATGCCAAAACTGTTGAAGATTATTGGAGGATGTGGAATATGCCTGTTCACAAATGGATGATCCGCCACCTATATTTTCCATGTTTAAGGCACGGTATACCAAAGGCCGTTGCTCTTTTAATTGCCTTCCTGGTTTCTGCTTTATTCCATGAGCTGTGCATCGCTGTTCCTTGCCACATATTCAAGTTGTGGGCTTTCGGTGGAATTATGTTTCAGGTTCCTTTGGTCTTCATCACTAATTATCTGCAAAATAAATTCAGAAACTCGATGGTTGGAAATATGATTTTTTGGTTCATATTCAGTATTCTTGGTCAACCTATGTGCGTACTGCTATATTACCATGACTTAATGAATAGGAAAGGCAAACTTGACTGAAGGTGCACGTGGATAAGCTTTTCTGTTTTTGGAGTGTATAATTGATGTCGATATGTTGATCAATATTGTTTTCCACGAGTACTTTCATCTACCATGGCAGTGGCTGCTCTGAAGGATTTCCACCTGATATACCAGGTCGCGAGGCTAATTCATCTTGATCTATGTACTTATCAACTCTCCTCTGGCAATTGTATCGATATATGCAATTTTGAGAGCCATACACTGGCATTGATAACTGCCAAGGAACAGTGTAGCTGTTTTCTGTTAAATGTTAATTAGTAGAGAGCTAGATGTAAATAATTTATGCTCAATATATTTATTTCTTCCTATTCTTC

DGAT1B Glyma.17G053300

>G.max Wm82.a4.v1|Glyma.17G053300.1
AAGAGAAGACTGAGTTAGAAAACACGCTCGGTCTTCTTCTCCAATGGCGATTTCCGATGAGCCTGAAAGTGTAGCCACTGCTCTCAACCACTCTTCCCTGCGCCGCCGTCCCTCCGCCACCTCCACCGCCGGCCTCTTCAATTCGCCTGAGACAACCACCGACAGTTCCGGTGATGACTTGGCCAAGGATTCTGGTTCCGACGACTCCATCAACAGCGACGACGCCGCCGTCAATTCCCAACAGCAAAACGAAAAACAAGACACTGATTTCTCCGTCCTCAAATTCGCCTACCGTCCTTCCGTCCCCGCTCACCGCAAAGTGAAGGAAAGTCCGCTCAGCTCCGACACTATTTTCCGTCAGAGTCACGCGGGCCTCTTCAACCTTTGTATAGTAGTCCTTGTTGCTGTGAATAGCCGACTCATCATTGAGAATTTAATGAAGTATGGTTGGTTGATCAAATCTGGCTTTTGGTTTAGTTCAAAGTCATTGAGAGACTGGCCCCTTTTCATGTGTTGTCTTTCTCTTGTGGTATTTCCTTTCGCTGCCTTTATAGTGGAGAAGTTGGCACAACGGAAGTGTATACCCGAACCAGTTGTTGTTGTACTTCATATAATCATTACCTCAACTTCGCTTTTCTATCCAGTTTTAGTTATTCTCAGGTGTGATTCTGCTTTTGTATCAGGTGTCACGTTAATGCTGTTTTCTTGTGTTGTATGGTTAAAATTGGTGTCTTATGCACATACAAACTATGATATGAGAGCACTTACCAAATTAGTTGAAAAGGGAGAAGCACTGCTCGATACTCTGAACATGGACTATCCTTACAACGTAAGCTTCAAGAGCTTGGCATATTTCCTGGTTGCCCCTACATTATGTTACCAGCCAAGCTATCCTCGCACACCTTATATTCGAAAGGGTTGGTTGTTTCGCCAACTTGTCAAGCTGATAATATTTACAGGAGTTATGGGATTTATAATAGAACAATATATTAATCCCATAGTACAAAATTCACAGCATCCTCTCAAGGGAAACCTTCTTTACGCCACCGAGAGAGTTCTGAAGCTTTCTGTTCCAAATTTATATGTGTGGCTCTGCATGTTCTATTGCTTTTTCCACCTTTGGTTAAATATCCTGGCAGAGCTTCTTCGATTTGGTGATCGTGAATTCTACAAGGATTGGTGGAATGCCAAAACTGTCGAAGATTATTGGAGGATGTGGAATATGCCTGTTCACAAATGGATGATCCGCCACCTATATTTTCCATGTTTAAGGCACGGTCTACCAAAGGCTGCTGCTCTTTTAATTGCCTTCCTGGTTTCTGCTTTATTCCATGAGCTGTGCATTGCTGTTCCTTGCCACATATTCAAGTTGTGGGCTTTCGGTGGAATTATGTTTCAGGTTCCTTTGGTCTTGATCACTAATTATCTGCAAAATAAATTCAGAAACTCAATGGTTGGAAATATGATTTTTTGGTTCATATTCAGTATCCTTGGTCAACCTATGTGTGTACTGCTATACTACCATGACTTGATGAATAGGAAAGGCAAACTTGACTGAAGCTACGGCCATTACATTTTAAAGGTGCACATGGATGAGCTTTTCAGTTTTCAGATTGTAAAATTGATGTGGATATGTTGGTCAATATTTGTTTTCTACGAATGCTTTCATCTACCATGGCATTGGCTGCTCTGAAGGAATTCCACGGGATATGCCAGTTCACGAGGCTAATTCATTATCTTGATCTATGTACTTACCAACTCTCCTCTGGCAATTGTATCAAAATATGCAATTTTGAGAGCCATACACTGGCATTGATAACTGCCAAGGAACACTCTAACTGTTTTCTGTTAACTGTTAATTAGTAGAGGGCTAGATGTAAATGGTTTATGCTCAATATATTTATTTCCTCCTAGTCTTCAAGTTCCACGGATGAATGATGTCTTTATAGCAGTTTTTTTCTT

DGAT1C Glyma.09G065300

>G.max Wm82.a4.v1|Glyma.09G065300.1
ACCACACGACGACGCTAGACCCTCCCCCATTCTTTTTTTTCCCTTTAATTCCCCTGACGCCATTCCGCGAAATTTCGCTCTTATATCCCACGACCTCGTTTCCAATCTTTTTTCTTAATTGATTCTGATTCTGATTTCTTTCTCTTTTTCTCTCTCCCTATATAAAAGACATTCGCAGTCTTTTTTACATTAAAAGAATAATCATTTTTGCACTGCCACGTGAGTGCCGTGTGGCGAAAGAGTAAACAAAACCGTTACTCCCTGCCGATGGCGATCTCCGATGTGCCTGCAGCCGCTGGCACGACCGCCACTACCACCAGCGACTCAGATCTCCGACAGCCTTCTCTGCGGCGCAGGTCCTCCGCCGGAGTCCTCTTCGACGCTGCCAGAGATTCCGGCTCCGACAATTCCCTGACCGGCAAAATCACCGACGACGACAACATCAAAGATCACAAGCCGAATAATCACGCAGCCTCCGACGACAATGTGGGCGCCGCCGCCAATGACGCTGGGCAGGAGCACCGACAACCGGTCGCCGATTTCAAATACGCTTACCGTCCCTCCGTTCCCGCGCACCGCAGAATCAAGGAGAGCCCCCTTAGCTCCGACAACATCTTCAGACAGAGTCATGCAGGACTGTTCAATCTCTGCATAGTAGTGCTTGTTGCCGTGAACAGCAGACTTATCATTGAGAATTTAATGAAGTATGGTTGGTTGATCAAGTATGGCTTTTGGTTTAGTTCAAAATCATTGAGAGATTGGCCTCTCTTCATGTGCTGTCTTAGTCTTGCCATATTTCCACTTGCTGCCTTTGTTGTGGAAAGGTTGGCACAACAAAAGTGTATTTCTGAACCAGTTGTTGTTCTACTTCATCTAATAATATCAACTGTTGAACTGTGCTATCCGGTTTTAGTAATACTCAGGTGTGATTCTGCTTTTGTATCTGGTGTCACGTTGATGCTATTAACTTGCATTGTGTGGTTAAAATTGGTGTCATATGCACATACAAACTATGATATGAGAGCACTTACTGTTTCGAATGAAAAGGGAGAAACATTACCCAATACTTTGATTATGGAGTATCCGTACACTGTGACCTTCAGGAGTTTGGCATACTTCATGGTTGCTCCTACATTATGCTATCAGACAAGCTATCCTCGCACACCTTCAGTTCGAAAGGGTTGGGTGTTTCGTCAACTTGTCAAGCTGATAATATTTACAGGAGTTATGGGATTTATAATAGAACAATATATGAATCCTATTGTACAAAACTCAACTCATCCTTTGAAGGGAAACCTTCTATATGCCATTGAGAGAATTCTGAAGCTTTCTGTCCCAAATGTATATGTGTGGCTCTGCATGTTCTACTGCTTTTTCCACCTTTGGTTAAATATACTTGCAGAGCTTGTTCGATTTGGTGATCGTGAGTTCTATAAAGATTGGTGGAATGCCAAAACTGTTGAAGAGTATTGGAGGATGTGGAATATGCCTGTGCACAAATGGATGGTTCGCCACATATATTTTCCATGCTTAAGGCGTGGTATACCCAAGGGTGCTGCTTCATTAATTGCATTCCTGGTTTCTGCTGTGTTTCATGAGTTATGCATTGCCGTTCCTTGCCACATGTTCAAGTTGTGGGCTTTTATAGGAATTATGTTTCAGGTTCCTTTGGTCTTGATCACTAATTACCTCCAAAATAAATACAGAAACTCAATGGTTGGAAATATGATTTTTTGGTTCATATTTTGTATTCTTGGTCAACCAATGAGCGTACTATTGTACTACCATGACTTGATGAATAGAAAAGGAGAAGTTGACTAAGGTAGCATTACACTGTTCATGTGGATGAGCTTTTGCGTTTTCTGAGTAAAATCGATGTTGATATGTTGGCTTCTTTGTTTTGTATGGGGATCACCACCTGTTTTGATAGTGAGTCCTCTGGGTTGCATTTCCATGTTAATTGCCTAGTCTTTCGAGCTTAATTCATCTTGATGTATTTCTTTGACTTAGTTGCTTTGGCGCTTTTATCATGAAAGCAATTTTGGAAGCAAACTAACGAAATGTCAAACACTAACTGCTAAGGTAACACTAACTACTAAGTTGAGTGATATATAGCTGTAAATGC

DGAT2a1 Glyma.01G156000

>G.max Wm82.a4.v1|Glyma.01G156000.1
ACGGATCACTCTATTCGATTAAGCGAAGCACGTGACGAGCCTAATTTACGCTTTACACCCCTACACTTCCCACAATTTGTTCCTGGAGACGACGCCGTTCCATCACACCCTCAGCGGTCAGAGCATGGCGGCGGAACCGGTGAGTGACGGCGGAGCCGCGGCGGAGAAATTGATCAGCGGGAGAGAAGAATTTGGTGATTCGTCCAACTTGTTCAGCGCGATTCTAGCAATGGTGCTGTGGCTGGGAGCTATTCATTTCAACATCGCCCTGATCCTCCTCGCCGTGTTCTTCCTTCCTCTCTCCAAATCGCTCTTGGTTTTCGGTTTTCTCTTTGGGTTTATGGTGCTTCCTATCAACGAGAAGAGCAGATTTGGCCGAAGATTGTCGAGGTTCATATGCAAGCACGCTTGCAATTACTTTCCGATCACGCTTCACGTAGAGGATATGAAAGCCTTTGATCCTAACCGTGCTTATGTTTTTGGGTATGAACCACATTCAGTTTTGCCAATTGGCATTGTTGCATTGGCTGACCACACAGGTTTCATGCCTCTTCCAAAAGTTAAAGTTCTTGCTAGCAGCACGGTGTTCTACACACCATTTTTGAGACACTTATGGACATGGTTGGGTCTTACACCAGCAACAAAGAAAAATTTTATCTCCCTGTTAGCATCTGGCCATAGTTGCATTTTAATACCTGGTGGAGTGCAAGAAGCATTTCACATGCAGCATGGCACTGAGATTGCTTTCCTTAAGGCAAGAAGAGGATTTGTCCGCGTAGCAATGGTGAAAGGCAAACCTTTGGTTCCAGTCTTCTGCTTTGGTCAGTCAAATGTCTATAAGTGGTGGAAACCAGGTGGGAAGTTATTTCTGAAATTTGCAAGGGCTATCAAGTTCACCCCAATATGTTTTTGGGGAATTTTTGGGTCTCCATTACCGTTCAGACATCCAATGCATGTGGTTGTGGGTAGACCAATTGAGGTTGACAAAAACCGAGAACCAACCACCGAGGAGGTTGCCAAGATACATGGTCTGTTTGTGGAAGCACTTCAAGATCTCTTTGAAAGGCACAAAGCTCGGGCTGGCTATCCAAACCTTGAGTTAAGAATAGTTTGACAAGGCCTTAATATTGTACCATATTTTCATTGGTTTATTTTATTTATTTATTTTATTCCTTTTGGGGATGGAGTTGGTGAATGAAAATGACCAACTATCATCTTGGGAATGAAATAGAATAATAATGAGAAATAGGGCAGTAGCTACCTTTCGTTAGGGTATCTATTTCAGTTCATGGACACATTTATATGCCTAGCCTTTATATGCTGGATGTTGTCAAAGTATTTCAGTCTGGGAACCTTTGCCACGGCTAGCAGAATAATAAGAAATGATAATACAAAGTAGTGGTGATCAAGGTATATATTACCGAAGCAACTCCCTGATTCAAGGGAAAAAACAAAGGTTTGATTGGGTTGAATTTGTATATATCTGATTGAGTCGGCTCGTGAACTAGGTTTAACAATCTTGTATCTGACCTGATTCAATCTAATTACAGAAAGAATATGTAGGATTCACTATATATATATATATATATGTATGTATGTATGTATATGTGTGTGTATGTAATGTGATTTAATGAATGTTTTGGGGAATAATATTGACAAGATGTTAATATTCTTTCAATTTTT

DGAT2a2 Glyma.11G088800

>G.max Wm82.a4.v1|Glyma.11G088800.1
CAATGGCGCTGTGGCTGTATTCACTTCAACATCGCCCTGGTCCTCTTCGCCGTGTTTTTCCTTCCTCTCTCCAAATCGATCTTGGTTTTCGGTTTTCTCTTTGTCTTTATGGTGCTTCCTATCAACCAAAAAAGTAGATTCGGCCGAAATTTGTCGAGGTTCATATGCAAGCACGCCTGCAATTACTTTCCCATCACACTTCACGTAGAGGATATGAAAGCCTTTGATCCTAATCGTGCTTATGTTTTTGGGTATGAACCACATTCAGTTTTGCCAATTGGCATTGTTGCACTGGCTGAACACACAGGTTTCATGCCTCTTCCAAAAGTTAAAGTGTTCTACACACCGTTTTTGAGACACACATGGACATGGTTGGGTCTTACACCGGCAACAAAGAAAATTTTTATCTCCCTGTTAGCATCTGGTCATAGTTGCATTTTAATACCTGGTGGAGTGCAAGAAGCATTTCTCATGCAGCGTGGCACTGAGATTGCTTTCCTTAAGGCAAGAAGAGGATTTGTCCGCATAACAATGGTGAAAGGCCGACCTTTGGTTCCAGTTTTCTGCTTTGGCCAGTCAAATGTCTATAAGTGGTGGAAACCAGGTGGGAAGTTCTTTCTGAAATTTGCAAGGGCTATCCCTGGTGCAGCGGTAAAGTCTCCATTACCGTTCAGACATCCTATGCATGTGGTTGTGGGTAGACCAATTGAGCTTGACAAAAAACCAGAACCAACCACCGAGGAGGTTGCCAAGATACATAGTCAGTTTGTGGAAGCACTTCAAGATCTCTTCGAGAGGCTATCCAAACCTTGA

DGAT2a3 Glyma.09G195400

>G.max Wm82.a4.v1|Glyma.09G195400.1
GAACAAATAAAATAAAAACAAATATTAAGACACGAGACAATCGAGTCGATGGAAACTCCGAGAAGAGACGAAAACCCACGTGACATTTTTGCCCCTCACACTTTCCCCTATTTACTCCACGCCCCTCACTTCCTTGTTCCTTCATAAAAACAACACTTCCTCCTCTTACATTCGGCAACCAAACCATGCAGCGCACGGCGGCGGCGACAGATGAACCACGGCGGCGCTCCGGCGACGCGGAGGGGGAGAAGGTGTTCAAGGGGAGCGAGGTGTTCGGCGACACGTCACCAAATTACTTGAAGACCATTTTGGCCCTGGCGTTGTGGCTCGGAACCATTCATTTCAACGTCGCGTTGGTGCTCTTCGCAATCTTCTTCCTCTCTCTCCACAAAGCACTTTTGCTTTTCGGTTTGCTTTTCGTGCTCATGGTAATTCCTGTTGATGAAAAGAGCAAATTCGGTCGAAAATTATCCAGGTACATATGCAAGCACGTTTGCGCTTACTTTCCCATCACGCTTCATGTGGAGGACATGAAGGCCTTTCATCCCAATCGTGCTTATGTTTTTGGTTATGAACCACATTCAGTTTTGCCAATTGGAGTTGTTGCGTTAGCTGACAACACAGGTTTTATGCCTCTTCCTAAAATAAAAGTTCTTGCTAGCAGTGCGATATTTTACACACCATTTTTGAGACACATATGGACATGGTTGGGCTTAACACCAGTGACAAGGAAAAGGTTTACCTCCCTGTTGGATGCTGGCTATAGTTGTATCTTGATACCTGGTGGAGTGCAAGAAGCATTTCTCATGGAGCATGGTTCTGAGATTGCCTATCTTAAAGCAAGAAGGGGATTTGTCCGCATAGCAATGGAGAAAGGAAAACCCCTGGTTCCAGTTTTCTGCTTTGGTCAGTCAAATGTCTATAAGTGGTGGAAACCAGGTGGGAAGTTAATTCTGAATTTTGCAAGGGCTGTCAAGTTCTCCCCAATATATTTTTGGGGAATTTTTGGATCTCCGATACCCTTTAAACATCCGATGCATGTGGTGGTGGGTAGACCAATTGAGCTCGAGAAAAATCACGAGCCAACTCCTGAGGAGGTTGCCAGAATACATAGCCAATTTGTTGAAGCACTTCAAGATCTATTTGAACGACACAAAGCTCGAGCTGGATATCCAAACCTTGAGTTGAGAATTGTTTGATATGGTCGTAACTTCGACCCATAGTTTCATGGGGGTAATTACACTTTTCTTCTCTTAGGTTAGGCTTTATTTGGGAGTTTTGAAGATGGAGTGGAGTGATTGGTTCATGATTAATTGGATTTGAATGGGGTGAGGTAAATAAATACTGTTGATTGATTGAGAAAGGAGTTATCTTTGTTGTCTTAGAAGTCACATTGGTAATTAATCATGTAAATTGTAAACTTCCAATTATGAGTCCGTGAACAATTTATATCAGATATATTTATAAATCTGAGATTAATT

DGAT2a4 Glyma.16G115700

>G.max Wm82.a4.v1|Glyma.16G115700.1
GAGAAGAGACGAAAATCCACATGACATTTTTGCCCCTCACACTTTCCCCTGTTTACTCCACGCCGCTTCCTTGTTCCTTCATAAACACAACACTTCCTTCTTACATTCGGCAATCAAACCATGCAGCGCACGGCGGCGGCGACAGAGGAACCACGGCGGAGCTCCGGCGACGCGTCGGCGGCGGAGGGGGAGAAGGTGTTCAAGGGAAGTGAGGTGTTCGGTGATACGTCACCAAATTATTTAAAGACGATTTTGGCCCTGGCGCTGTGGCTCGGAACCATTCATTTCAACGCCGCGTTGGTGCTCTTCGCAATCTTCTTCCTCTCTCTCCACAAAGCATTCTTACTTTTCGGTTTGCTTTTCGTGCTGATGGTGATTCCTGTTGATGAAAAGAGCAAATTCGGTAGAAAATTATCCAGAAGAAAAAAAAAAATTTGGGTGTGTTTCAGGTACATATGCAAGCACGTTTGCGCTTACTTTCCCATCACGCTTCATGTGGAGGATATGAAGGCTTTTCATCCCAGTCGTGCTTATGTTTTTGGTTATGAACCACATTCAGTTTTGCCAATTGGAGTTGTTGCATTAGCTGACAACACATGTTTTATGCCTCTTCCTAAAATAAAAGTTCTTGCTAGCAGTGCGATATTTTACACACCATTTTTGAGACACATATGGACATGGTTGGGTCTAACGCCAGTGACAAAGAAAAGGTTTACCTCGCTGTTGGATGCTGGCTATAGTTGTATCTTGATACCTGGTGGAGTGCAAGAAGCATTTCTCATTGAGCATGGTTCTGAGATTGCCTTTCTTAAATCAAGGAGAGGATTTGTCCGCATAGCAATGGAGAAGGGAAAACCCCTGGTTCCAGTTTTCTGCTTTGGTCAGTCAAATGTCTATAAGTGGTGGAAACCAGGTGGGAAGTTAGTTCTGAATTTTGCGAGGGCTGTCAAGTTCTCCCCAGTATATTTTTGGGGAATTTTTGGATCTCCGATACCCTTTAAACATCCAATGCATGTGGTAGTGGGTAGACCAATTGAGCTCGAGAAAACTCCCGAGCCAACTCCTGAGGAGGTTGCCAAAATACATAGCCAGTTTGTTGAAGCACTTCAAGATCTATTTGAACGACACAAAGCTCGAGCTGGATATCCAAACCTTGAGTTGAGAATTGTTTGATATGGTCATAACTTCGACCCATATTTTCATGGGGTTAATTACACTTATCTCCTCTCAGGTCAGGCTTTATTTGGGAGTTTTGAAGATGGAGTGGAGTGATTAGTTCATGATAATTGGATTTGGAATGGGGAGAGGTAAAACAATGCTGTTGATTGATTGAGAAGGGAGTCATCTCTGTTGTTTTAGAAGTCACGGGTAATTAATCATGTAAACTGTGTTAGTTTAACTTCCTATTGAGTCTGCACGATTTATATCAGAAATAGTTATAAATCTTAGATTAATTTAAAATGTTACTTTATGACATAGGGTGTGTTTGGGACAACTGTAAAAGATAGATTATTTCAATAATCGATTATAATCATC

DGAT2a5 Glyma.16G115800

>G.max Wm82.a4.v1|Glyma.16G115800.2
AAAGGAAAGGTGCGTAGCATAAATTCCATGTCAACCAACTACCCACACTAGAGCGAACAAAGCATGGGGAAAGTGTTCAATGGAGTAGAAGAGTTCTCTGAATCACGCAATGTGTTCAAGACGGTTCCTGCATTGGTGTTGTATCTTGGAGCAATTCATTTCAACCTTGCGTTGATACTCTGGGCCACAGTCTTCCTTCCTCTCTCCAAAGGACTCTTGGTGTTCGGTTTGCTCTTGGTGTTCGTGCTCATCCCTGTGGACGAGAACAGCATTTTTGGTCATAAATTGTCCAAATACATATGCAAGCACATTTGCTCCTATTTTCCCATAACGCTTCACGTAGAAGAAGCAAAAGCCTTTCGTCCTGATCAAGCTTATGTTTTTGGGTATGAACCACACTCGGTTTTTCCAATTGGCATTGTTGCACTTGGTGACAGCACTGGCTTCATGCCTCTTGCAAAAACAAAATTTCTTGCTAGCAGCGCCGTATTCTATATACCATTTTTGAGACACATATGGACATGGTTAGGATTTACGCCAGTGACAAAGCAAAATTTCATTTCCTCGTTGGAAGCTGGTTACAGTTGCATTTTAGTACCTGGTGGAGTTCGAGAAACATTTTTTATGGAGCCTGGTTGTGAGATTGCCTTTCTTAAGCAAAGAAGAGGATTTGTCCGCATAGCATTGCAAATGGGCCTACCCCTTGTTCCAGTTTTCTGCTTTGGCCAGACAAAAGCCTACAAGTGGTGGAAGCCTCCAGGAAGGTTAATGCAAAATCTTGCAAGGTTTTTGAAGATAATTCCATTATTTTTCTGGGGTATTTATGGATCTCCTATACCATTCAAAAATCCATTGTATATCGTCGTGGGTAGACCAATTGAGCTAGAGAAAAATCCAGAACCAACAATGGAGCAGGTTGCCAAAGTACATAGTCAGTTTGTTGAAGCACTTCAAGATCTTTTCGACCGACACAAAGCTCATGCTGGATATACAAATCTCGAGCTGAAAATATTTTGACAAGGCCAACGTCTGTTGGTCCTAGCTAGTGGCAAGCTTTAGTTGTCTTCGGGTGAAGTCATACATTTGAATTTTGTGAACAGAGAAAAAAAAATAGTCATTAAGCCCCTTAAATGAGTTTACTCGGTTTGACTTGGATTATACCAAATATCTAAACTAAAAAAACGAACAAAAAAATGTTTAACTAGATCACGATTTCATCTCATATTTGTGTCAAAAACATGTATTTATTTTTTACTTTGTTTTTCTTCCTCCGATGTGGTTGCAAGATTTCACTTGTT

DGAT2b1 Glyma.03G243700

>G.max Wm82.a4.v1|Glyma.03G243700.1
CAGCGTTTGCATTTTGGTGTGTGGCTACCTCCTTTCTTTTCCATTCGTGTGTTTCGCTGCAATTTTGCTTCTATCACTCACTCATTCACCGTTACATTTCATTTTCCGCTAAACACAAAACACGTGACCTTCCTCACAGAACAGAAAACTCATTTCTTGCTTCATTCATTTTTACTTTAACATGCAAACTAGCATGTAACGTAAGTTTAACAGTAAAGTAGCTTCCGTTCCCGTTGTGAATGATGGCCTTGGTGACGGGTTTTCTAGCCTCACATGTCGGTGCTGTAAGGCACCACCGGTTTGAAGTTGGAATTGGAGTTCGGGCGGTGTCGTCATCTGAATCTGAAACAGTGGCAGCTGTGAACGGATCTTCTTCGCGGAATGGTTCCTTGCTACTGAAGGAGGAAAAGAAGGTGCCTTTCTTGCGAGTTGAAGAGAAGAAGAATAAGAGGGGAGAAGAAGAAGAAGAAGGTTTGGCAGCACTTTGGGATGATGGGTATGGAAGAAGGAGTGTGGAAGATTACTTTGCTGCAGCTAAGGAGATGTGCAAATCCGATGGAGGCCCACCTCGATGGTTTTGCCCACTTGAATGTGGGCCTCCTTTCAAGGATTCTCCCACTCTCCTGTTTTTACCTGGGATGGATGGCACAGGATTGGGTCTCACTTTGCACCATCAAGCCCTTGGGAAGGCTTTTGAAGTTCGTTGCTTGCATATTCCAGTTCATGATCGAACACCATTTGAAGGGCTGGTGAAACTTGTTGGAGAAGCTGTCAAGCTCGAATGTGCTTTGTCTCCAAATAAACCAATCTATCTGGTAGGTGATTCTTTTGGTGGAAGTTTAGCACTTGCTGTTGCTGCTCGCAATCCAACAGTTGACCTAGTACTGATATTAGCCAATCCAGCTACATCCTTCGGCCAATCTCAGTTGCAACCTTTGTTTCCTTTCATGGAAGCTTTGCCTGACGAACTGCATGTTGCTGTTCCCTTTCTTCTTAGTTTTATCATGGGTGATCCAGTGAAGATGGCATCAGTCAATATTGACAATAAGCTTCCTCCTGCCAAAAAAATTGAACAATTGTCATACAACCTTACTGCATTGCTGCCGTGTCTTCCTGAGCTGGCTGATATTATACCAAGGGATACTCTTCTTTGGAAGCTGAAACTTCTCAAATCAGCTGCTGCATATGCTAATTCACGTATTCATGCTGTTAAAGCTGAAGTTCTTGTACTTGCTAGTGGCAAGGATAACATGCTTCCCAGCATAAACGAAGCTCAAAGACTCATGGGATTATTGCAAAACTGCAAAGTTCGTGTCTTTAAGGACAGTGGACACACACTTCTCCTGGAAGATGGTATTGGTCTGCTGACAATCATCAAGGGAACTTGCATGTACCGTCGCTCAAGGAGGCATGATTTGGTCAGGGATTTCATACCTCCCAGTATGACAGAATTCAGATATGCAATGGATCAAGTAGTTGGATCATTTCGTTCTGTTACTGGATCTGTATTTTTCTCAACATTGGAGGATGGAAAGATTACAAAAGGTCTCTCTGGTGTTCCAGATGAAGGTCCTGTCTTATATGTTGGTTATCACATGTTGTTGGGGTTAGAGCTTATCTCACTCACAGATGGATTTTTAAGTGAGAAGGGTATTGTGCTTCGTGGAATAGCCCATCCCGAGCTGTTCAGGCCTAAAGTTGAGTCTTGGTCTTCTGAGTTTTCTATGATTGATTGGGTGAAGATATTTGGTGGGGTGCCTGTTTCAGCAAGCAATATTTTCAAATTGCTTTCAACAAAGTCACATGTTCTCCTATATCCTGGTGGTGCGCGTGAGGCTCTCCATTATAAGGGGGAAGCATACAAGTTGACTTGGCCTGATCACCCAGAATTTGTGAGAATGGCAGCACGATTTGGTGCCACAATTGTGCCATTTGGAGCTGTAGGTGAAGATGATTTAGCTGAATTAGTTCTTGACTACAACGACTTAATGAAGATCCCCATAGTCAACGATCGTATAAGAAATATGAATCGTGACTCAGTTAAGTTTAGAGATGAAACAAGTGGCGAGGTGGCAAACCAAAATCTCACTTTTCCAGTGCTTCTACCAAAGATACCAGGTCGCTTTTACTTTCTATTTGGGAAGCCCATAAAAACAAAAGGCATGGATAAGATTCTAAAAGACAGAGAAAGTGCCAACCAAATGTACCTTGAGATTAAGTCAGAAGTTGAACACAATTTAAATTACTTGATCAAGAAGAGGGAGGAGGATCCATACAGGAACTTCGTCGATAGGAAAATGTATCAGATATTTTATCCTCACGAAACTGATCCAACGCCATCATTTAAGCCCTGAAAAATGTTTTTGATATATAATACTCTTTTTATGTAATCATAATTATTCTTAAACAGGTACATGTACATGGCCATTATTCTAATAAAATATCACTTTAT

DGAT2b2 Glyma.19G241200

>G.max Wm82.a4.v1|Glyma.19G241200.1
ATTCAATCTTTAAAAAAATTCAACATATTTTAGTAAGCACATTTAAAAAGTAAATCCTACATTTTTCATTGCCATTGGTCGCAAGTCGCAATCATTGTTATCTTGTTGTGTCTGGTACAGTGACTTCCAGCATTTTGATTTTCGTGTGTGGCGCGGCTGTGGCTATGCGTTTCTTTCCTTTCCTTTCCATTTGTGTGATTCGCTGCAATTTCGCTTCTATCACTCACTCACCGTTACATTTCATTTTCCGCTGAACACCAAACATGTGATCCTCACACTTACACCAGACAGAACAGAAAAGTCATTTGTTGTTTCATGTTTACTTTAAACTCTCTCTCTCCAAAAAACAACAACAACAAGAACAGAGTGAACAATAGTAACCGTTGATGGCCTCGGTGACGGGTTTTCTAGTCTCACCCGCGGGAGCTGTAAGGCACCACTGGTTTGGAGTTCGGGCGGTGTTGTCATCTGAATCTGGAACAGTGGCAGCTGTGAACGGATCTTCTTCGCAGAATGGTTCCTTGGCACTTAAGGAGGAAAAAAAGGTGCCTTTGTTGCGAGGTGAAGAAGAAGAAGAAGGTTTGGCAGCACTTTGGGATGATGGGTATGGGAGAAGGAGTGTGGAGGATTACTTTGCTGCAGCTAAGGAGATGTGCAAATCCGATGGAGGCCCACCTCGGTGGTTTTGCCCCCTTGAATGTGGTCCTCCTTTCAAGGATTCTCCTACTCTTCTCTTTTTACCTGGGATGGATGGCACAGGATTGGGTCTCACTTTGCACCATAAAGCCCTTGGGAAGGCTTTTGAAGTTCGTTGCTTGCATATTCCGGTTCATGACCGAACACCATTTGAAGGGCTGGTGAAACTTGTTGGAGAAGCTGTTAAGCTTGAATGTGCTTTGTCTCCAAATAAACCAATCTATCTGGTAGGCGATTCTTTGGGTGGAAGTCTAGCACTTGCTGTTGCTGCTCACAATCCAACAGTTGACCTAGTACTGATATTAGCCAATCCAGCTACATCCTTCGGCCAATCTCAGTTGCAACCTTTGTTTCCTTTCATGGAGGCTTTGCCTGATGAAATGCATGTTGCTGTTCCCTTTCTTCTTAGTTTTATCATGGGTGATCCAGTGAAGATGGCATCAGTCAGTATTGAAAATAAGCTTCCTCCTGCCAAAAAAATTGAACAATTGTCATACAACCTTACTGCATTGCTGCCGTGTCTTCCTGAGCTGGCTGATATTATACCAAGGGATACTCTTCTTTGGAAGCTGAAACTTCTCAAATCAGCTGCTGCATATGCTAATTCGCGTATTCATGCTGTTGAAGCTGAAGTTCTTGTGCTTGCTAGTGGCAAGGATAACATGCTTCCCAGCACAAACGAAGCTCAAAGACTCGTGGGATTATTGCAAAACTGCAAAGTTCGTGTCTTTAAGGACAGTGGACACACACTTCTCCTGGAAGATGGCATTGGTCTGCTGACAATCATCAAGGGAACTTGCATGTACCGTCGTTCAAGGAGGCATGATTTGGTCAGGGATTTCATACCTCCCAGTATGACAGAATTCAGATATGCAATGGATCAAGTAGTTGGATCATTTCGTTCTGCTACTGGATCTGTATTTTTCTCAACCTTGGAGGATGGAAAGATTGTAAAAGGTCTCTCTGGTGTTCCAGATGAAGGTCCTGTCTTATATGTTGGGTATCACATGTTGTTGGGGTTAGAGCTTATCTCACTTACAGATGGATTTTTAAGTGAGAAGGGTATTGCACTTCGTGGAATAGCCCATCCCGATCTGTTTAGGCCTGAAGTGGAGTCTTGGTCTTCTGAGTTTTCTATGTTTGATTGGGTGAAGATATTTGGTGGGGTGCCTGTTTCAGCAAGCAATATTTTCAAATTACTTTCAACAAAATCACATGTTCTCCTATATCCTGGTGGTGCGCGTGAGGCTCTCCATTATAAGGGGGAAGAATACAAGTTGATTTGGCCTGATCATCCAGAATTTGTGAGAATGGCAGCACGATTTGGTGCCACAATTGTGCCATTTGGAGCTGTAGGTGAAGATGATATAGCTGAATTAGTTCTTGACTACAATGACTTAATGAAGATCCCCATAGTCAACGATCAAATAAGAAATATGAACCGTGACTCAGTTAAGTTTAGAGATGAAACAAGTGGCGAGGTGGCAAACCAAAATCTCTCTTTTCCGGTGCTTCTACCAAAGATACCAGGTCGCTTTTACTTTCTATTTGGGAAGCCCATAAGAACAAAAGGCATGGATAAGATGCTAAAAGACAGAGAAAGTGCCAACCAAATGTACCTGCAGATTAAGTCAGAAGTTGAACACAATTTAAATTACTTGATCAAGAAGAGGGAGGAGGATCCATACAGGAACTTCATCGATAGGAAAATGTATCAGATATTTTATCCTCCTGAAACTGATTCAACCCCATCATTTAATCCCTGAAAAATGTTTTGATATATATAATACTGATTTTTATGTAATCATAATTATTTTTAAACAGGTACATGTACATGTACATGGCCATTATTCTAATAAAATATGGTGCTTTCTATGTACCC

DGAT2b3 Glyma.16G051300

>G.max Wm82.a4.v1|Glyma.16G051300.1
AGAAATACGCAACAGAGACACAGTGCAAACACAGTCACATCCGGAATGTAAGAAACAAGCCTTGCGTTGCTCATATCTGACTTTCACAATAATATATTACACCTTTTCTTTAATCTCCTTCTCTTCTCATTCCTTCATCGCAATACTAATCTTATATCTCGCGTCGCAATATATTATAGTATTACCTTCTTAATTATCACAAACGCGCTTTTCATATTCGAATCTCGCGCCAACATGGCGGCCACCGGAGCCCGTCTCTTCTCCGCTGCACTCTTCCGCCGTTATCCGCCGTCGCCGGACGGAAAAACGAACTCCCGCCGGACTCCGATTGCGACTCCGCGCCTCGCCGTGTCGGTGGACCAGGTTCCGCCGGCGACGGTGGAGAAAGAGAAGCGTAGGGAAGAGAAGAAGAAGCGACGCATGAACGGTTGGAATGAGTATTTGGAGCGGTCGAAGGAGTTGATCAAACCGGACGGTGGACCGCCGCGGTGGTTTTCGCCGTTGGAGTGCGCTTCGCGATTGGACAACTCCCCTCTTCTGCTCTTTTTGCCAGGGATTGATGGCGTGGGACTTGGACTTATTTTACATCATCAGAAACTGGGAAGGATTTTTGATATATGGTGCTTGCATATTCCAGTCGCTGATCGGACACCATTTACAGACCTAGTGAAAATAGTTGAGAGAACAGTTAGGTCAGAATATCAACGTTCACCAAACAGACCCATATATCTTGTTGGAGAATCTTTAGGAGCTTGCCTTGCACTGGCTGTTGCAGCACTTAGCTCTGATATTGATCTTGTACTGATTTTGGCGAACCCAGCTACTTCGATCAGAAGGTCACACCTGCAACTTCTAACACCATTATTGGAAGCTTTGCCCGATCCATTCTCTCCTGCCCTGCCTAACATTCTCAGATCAACAACAGGTGAATCTCTGAGGATGGTGTTAGATAATGTGGTCCAAGGGCTCCCTCTACAAAATACAGCTGGAGAGCTAGTGAAGGATTTTACTACTTTCTCATTATCTTTGCACGTTCTTGCTGACATATTACCAAAAGAAACACTTGTGTGGAAACTGAAGATGCTTAAGTCAGCTTCTGCTTATGCCCTTTCACGCCTTTATGCTATCAAAGCTCAGACTTTGATACTTTGCAGTGGAAATGATCAGTTACTGCCTAGTCAACAGGAAGGTGAAAGACTACTGGAGTTACTGCCTAGATCTAAAAGCCAACTTCGTAAATTTAATGACAGTGGCCATTTCCTATTCCTGGAGGACAGCATTGACCTGGTAACTATAGTCAAGGGCACTTCATACTACCGCCGCGGCAAGTCTCATGACTATATATCAGATTATATACCACCAACACCTGAAGAAGCCAGAAAAGTAACAGAATCATACAGTTTGTATAACCTTGTCTCAACTGTAATGCTCTCAACTTTGGAGGATGGGACTATTGTAAAAGGCCTTGCTGGAATTCCTTCAGAGGGGCCTGTTTTGTTTGTTGGGGACCACATGCTACTGGGATTAGACAAAGTTCCCCTGTGGTGTAGAATTTTTTCTGAAAGAAATATCGTTGTTAGAGGGATAGCACATCCCTTGTTTTTTATGAGAACTAAAAAAGGAAAATTGCCAGATGTATCTTATTTTGACGGTCTCAGAATCATGGGTGCTGTGCCTGTAGCACCAACCAACCTCTACAAGCTTTTTTCTTCCAAGTCTCATGTCCTATTATATCCTGGAGGGATACGCGAGGCTTTTCATAGGAAGGGTGAAGAATACAAGTTATTCTGGCCTGAACAATCCGAGTTTGTAAGGATGGCAGCAAGATTTGGAGCCAAAATAGTACCTTTTGGTGTAGTTGGAGAAGATGACATTGGTCAAGTAGTTTTTGATTATGACGACTTGGTGAAAATTCCTTACTTTAGGTCTGAAATAGAAAGCCTCACAAAGGAGACTGCGCACTTGAGGAATGATGCTGGTGGTGAGGTGGCAAATCAACAAGTGCATTTGCCTTTGATTTTGCCTAAAGTTCCTGGCCGGTTCTACTTTTATTTTGGAAAACCATTGGAAACGAAAGGAAGGGAACAAGAACTGAGAGACAAGCAGAAATCTCAAGAGTTATATTTACAAGTGAAATCTGAGGTTGAGAAATGTATTGCTTATTTAAAGGAGAAAAGAGAAAGCGACCCCTACAGAGGTTTAGGGCCTCGCCTATTATACCAGGCCAGTCATGGCTTTGAGTCTGATGTTCCAACATTTGAAATTTAAATGAAAAATAAATATAT

DGAT2b4 Glyma.16G051200

>G.max Wm82.a4.v1|Glyma.16G051200.1
ACTTCCAGATTCAGATTTTCATTTTCTGTCAATCATTGAGTCCTCATTCGAACATTTCCGCAAACAATAATCAACTTCCTCAAACGCTACTCACGTTCGAATCTTCCGCCGCCATGGCGGCCGCCGGAGCATGCCTCTTCTCCGCCGCGCTCTTCCGCCGGCCGGCTGGAAAACCGAGCTCCAGCCGGATCTCGAGTACGACTCCTCGCCTCGCCGTGTCGGCGGATCGGGTTCCGGCGTCGACGGCGGCGGCGGAGAGCGGAGAAGGAAATGGTGCGGTGGTGAGAGAGAAGCGTAGGGAAGAGAAGAATGAGAAGGAGAAGGAGAATCGACGCATGCACGGTTGGAAGGAGTATTTGGAGCATTCGAAGGAGCTGATTGAACCGGACGGTGGACCGCCGCGGTGGTTTTCGCCGTTGGAGTGCGCTTCGCGATTGGATAATTCTCCTCTTCTGCTCTTTTTGCCGGGGATTGATGGCGTGGGACTTGGACTTATTTTACATCATCAGAAACTGGGAAGGATTTTTGATATATGGTGCTTGCATATTCCAGTCGCGGATCGAACATCATTTACAGACCTTGTGAAAATAGCTGAGAGAACAATAATGTCAGAACATCAACGCTCACCAAATAGACCCATATATCTTGTTGGAGAATCTTTAGGAGCATGCCTTGCGCTGGCTGTTGCAGCACTTAACCCTGATATTGATCTTGTACTAATTTTGGCGAACCCAGCTACTTCATTCAGCAGGTCAAACTTGTTACTTCTAACACCATTATTGGAAGCATTGCCTGATCCACTCTCTCCGGGCCTGTCTAACATTCTCAGATCGACAGAAGGTGAATCTCTGAGGATGGTGTTGGATAATGTGGTCCAAGGGCTTCCTCTACAAAATACAGCTGGAGAGCTAGTGAAGGATTTTACTGCTTTCTCATTGTCTCTGCCTGTTCTTGCTGACATATTACCAAAAGAAACACTTGTGTGGAAACTAAAGATGCTTAAGTCAGCTTCGGCTTATGCCCATTCACGCCTTTATGCTATCAAAGCTCAGACTTTGATACTTTGCAGTGGAAATGATCAGTTACTACCTAGTCAACAGGAAGGTGAAAGACTACTGGAGTTACTGCCTAAATCTAAATGCCAGCTTCGTAAATTTGATGACAGTGGCCATTTCCTATTCCTGGAAGACAGCATTGACCTGGTAACGATCATCAAAGGCACTTCATACTACCGCCGTGGCAAGTATCATGACTATGCATCAGATTTTATTGCACCAACAGTTGATGAAGCCAAAAACATAATAGAATCAAACAGTTTGTTTAACCTTATTGCAAGTGCTGTAATGCTCTCAACTTTGGAGGATGGAACAATTGTAAAAGGCCTTGCTGGAATTCCTTCAGAGGGGCCTGTTTTGTTTGTTGGGTACCACATGCTACTGGGATTAGAAAAAATTCCCCTGGTTTCTCGAATTTTTTTGGAAAGAAATATCCTTGTTCGAGGGATAGCACATCCCATGATGTTTATGAGATCTAAAAATGGAAGATTACCAGATTTATCTTCTTTTGACAAATTCAGAGTTATGGGTGCTGCCCCTGTAGCACCAACTAACCTCTTCAAGCTCTTTTCATCTAAGTCTCATGTCCTATTGTATCCAGGAGGGATGCGTGAGGCTCTTCATAGGAAGGGTGAAGAATACAAGTTATTCTGGCCTCAACAATCTGAGTTTGTAAGGATGGCAGCAAGATTTGGAGCCAAAATTGTACCTTTTGGTGCAGTTGGAGAAGATGACCTTGGTGAAGTAGTTTTTGATTATGATGACTTGGTGAAGATTCCTTACTTTAGGTCGGAAATAGAAAGCCTCACAAATGAGGCTACGCAGTTAAGGAGTGATGCTGGTGGTGAGGTGGCAAATCAGCCAGTGCATATGCCTTTGATTTTGCCTAAAGTTCCTGGTCGGTTCTACTATTATTTTGGAAAACCATTGGAAACGGAAGGGAGGAAACAAGAACTGAGAGACGACAAACAGAAATCTCATGAGTTATATTTACAAGTGAAATCTGAGGTTGAGAGATGTATTGCGTATTTAAAGGTGAAAAGAGAAAGCGACCCCTACAGAGGTATAGGGCCTCGACTATTATACCAGGCTACACATGGTTTCGAGTCTGAAGTTCCAACATTTGAAATTTGATTGTTTTGCACACACACACAAAAAAAGAAGGTAATTTTCTAATTGGTTCTGAAGGGGCCTTTGCATTCCCTAGGTTAGAGATAAACAATGAATATTAGTTTCAGGATTGTTTTCAGGCCGAAAAGGCACGATTTCTGATAGAAACATTTTACAATTTTACCTGGTTTAAATCAATAAGAGATAAAATGCAAATAATAGATTAATGGGGAAGGAGAACAACTACTGAAGTTCTATTTAAAAGGGATTTTGTTTTGTGTGTGCATGACACATGATAAGAAGTTCTAGGGTGTATCAAATTCCATTTGGTAATTAATTTAACAATATTCTT

DGAT2b5 Glyma.19G099400

>G.max Wm82.a4.v1|Glyma.19G099400.5
AAGTAACTGGTGACGAACAAAGTACGCAACAGAGACACCGGACACACCCATGGAAGAATCGTTGCTCTTCCTCAAACCTCGTGTCTGATTTTTCCACAATTACTAACTTCCTCAAACGCTACTCACGTTCGAATCTCCCGCCGCCATGGCGGCCGCCGGAGCATGTCTCTTCTCCGCCGCGCTCTTCCGCCGTGAGCCGCCGTCTCCTGCCGGGAAACCGAGCTCCCACCGGATCTCGAGTACGACTCCGCGACTCGCCGTGTCGGTGGACCGAGTTCCGGCATCGACGGCAGCGGTGGAGAGCGGAGAAGGAAACGGTGCGGTGGTGAGAGAGAAGCGTATGGAAGAGAAGGAGGAGAAGGAGAATCGACGCATGAACGGTTGGAAGGAGTATTTGGAGCAATCGAAGGAGCTGATAGAACCGGACGGTGGACCGCCACGTTGGTTTTCGCCGTTGGAGTGCGCTTCCCGATTGGACTATTCTCCTCTTCTGCTCTTCTTGCCGGGGATTGATGGCGTGGGACTTGGACTTATTTTACATCATCAGAAACTGGGGAGGATTTTTGATATGTGGTGCTTGCATATTCCAGTCGCTGATCGGACACCGTTTACAGATCTTCTAAAAATAGTTGAGAGAACAGTTAGGTCAGAACATCAACGTTCACCAAATAGACCCATATATCTTGTTGGGGAATCTTTAGGAGCATGCCTTGCACTGGCTGTTGCGGCACTTAACCCTGATATTGATCTTGTTCTAATTTTGGCGAACCCAGCTACATCATTCAGGAGGTCAAGCTTGCAACTTCTAACACCATTATTGGAAGCGTTGCCCAATCCACTCTCTCCTGGCCTGCCTAACATTCTCAGGTCGACAGAAGGTGAATCTCTGAGGATGCTGTTGGATAATGTGGTCCAAGGACTTCCTCTACAAAATACAGCTGGAGAGCTAGTGAAGGATTTTACTGCTTTCTCATTATCTCTGCCTGTTCTTGCTGATATATTACCAAAAGAAACACTTGTGTGGAAACTAAAGATGCTTAAGTCTGCTTCGGCTTATGCCCATTCACGCCTTTATGCTATCAAAGCTCAGACTTTGATTCTTTGCAGTGGAAATGATCAGTTACTACCTAGTCAACAGGAAGGTGAAAGACTACTGAAGTTACTGCCTAAATCTAAATGCCAGCTTCGTAAATTTGATGACAGTGGACATTTCCTATTCCTGGAAGACAGCATTGACCTGGTAACAATCATCAAAGGCACTTCATACTACCGCCGTGGCAAGTATCATGACTATGCATCAGATTTTATACCTCCAACACTTGATGAGGCCAAAAACATAATAGAATCAAACAGTTTGTTTAACCTTATTGCAAGTGCTGTAATGCTCTCAACTTTGGAGGATGGGACGCTTGTAAAAGGCCTTGCTGGAATTCCTTCAGAGGGGCCTGTTTTGTTTGTTGGGTACCACATGCTACTCGGATTAGAAAAAATTCCCCTGGTTTCTCGAATTTTTTTGGAAAGGAATATCCTTCTTCGAGGGGTAGCACATCCCATGATGTTTATGAGATCTAAAAATGGAAGGTTACCAGATTTATCTTCTTTTGACAAATTCAGAGTTATGGGTGCTGTCCCTGTAGCACCAACTAACCTCTTCAAGCTCTTTTCTTCTAAGTCTCATGTCCTATTATATCCTGGAGGGATGCGCGAGGCTCTTCATAGAAAGGGTGAAGAATACAAGTTATTCTGGCCTGAACAATCTGAGTTTGTAAGGATGGCAGCAAGATTTGGAGCTAAAATTGTACCTTTTGGTGCAGTTGGAGAAGATGACCTTGGTGAAGTAGTTTTTGATTATGATGACTTGGTGAAGATTCCTTACTTTAGGTCGGAAATAGAAAGCCTCACAAATGAGGCTACGCAGTTGAGGAGTGATGCTGGTGGTGAGGTGGCAAATCAGCCAGTGCATATGCCGTTGATTTTGCCTAAAGTTCCTGGTCGGTTCTACTATTATTTTGGAAAACCATTGGAAATGGAAGGGAGGAAACAAGAACTGAGAGACAGGAAGAAAGCTCATGAGATTTATTTACAAGTGAAATCTGAGGTAGAGAGATGTATTGCTTATTTAAAGGTGAAAAGAGAAAGCGACCCCTACAGAGGTATAGGGCCTCGACTATTATACCAGGCTACACATGGTTTTGAGTCAGAAGTTCCAACATTTGAAATTTGATTGTTTTGCACAAAAAATAAGGCAATTTTCTAATTGGTTCTGAGGCTTGTTTTGCATTCCCTAGGTTAGAGGCAAACTATGAATATTGCCAGTAGTTTCAGGATTGTTTTCGGGCCGAAAAGGCATGATTTCTTAATAGAAACATTGTACAATTTTACCAAGTTTAAATCAATAAGAGATAAAATACAAATAATAGATTATTGGGGAAGGAGAACAACTACCGAAGTTCT

WS/DGATa1 Glyma.12G114400

>G.max Wm82.a4.v1|Glyma.12G114400.2
TTTTAATTGAAGTGCTATTTCACTCTCATTTTCATACACAAACTAACACAATGGACCAATTCTATGATGAGGTTCAAGAGCCCGTGAGTCCTCATGGACATTATTTCAACAGTTCGGTGA

TTTGCTCCTATGTTTTTGGCTTTCTTGAAATGGCAGTTCCAATTGATGACTCACAGACTATACCTTTGCT

GGAAGATGTCTTCCTCCCCATCAACCCACGTTTCTCCTCTATTATGGTCAGAGACCAAGCTGGTAAAATG

AGATGGAAAAGGGTACAAGTGAATCCTGAAGAGCATGTAAAAGTCCCTAGATTTCCTGAATGCAATTCAG

CAGAATTGTATGAGCAATATTTTGATGATTATGTGACAAGGATTCTAAATGAACGGACACCTCAGAACAA

GCCACTATGGGAAATCCATCTTATTAAGTATCCAACAAGCAGTGCTGCAGGCACAATAATTTTCAAATTT

CATCATTCACTTGGAGATGGTTATTCCCTCATGGGTGCCCTTCTTTCTTGTCTTCAAAGAACTGATGACC

CTTCTCTTCCACTAACTTTTCCTTCAAATTCACAGCATGCAAAGAAAAACATGTTTAAGTTACATTCAGT

GATATCCTCCCTCTTTAGCTCCATGTTAGATTTTGGATCTAGCATAATAAAGACTAGAATGATTGAAGAT

GACAAAACACCCATAAGGTCTGGATATGAAGGAACTAAGCCTAAGTATTTCACCTTGTCAAACATATCAT

TATCTCTTGATCATATTAAAGCAATCAAGTCCAATCTTGGAGTGACAATAAATGATGTGATTACAGGGAT

AATTTTCTATGGAATTCGTTTGTACATGCAAGATATTGACTACTTGACAAGAAAAGCAAACTCCACAGCT

TTGGTAGTGCTCAACACAAGAAATATTAGAGGGTAACAATCGGTGAAGGAGATGCAAAAACCAAAGGTCC

AAGGTCTCTGGGGAAATAAAATTTCTTTCTTACAAATACCAATTCCAAAGCTAAGTCAATCCAAAATCTC

CAACCCTCTTGAGTTTGTTTGGAATGCCCGTAAACTAATCAAGAGGAAGAGACATTCTTTCAGTGTTTAT

CTCATAGGTTTGCTCCTGGATTTGGAGATGAAATTAAGAGGTCCTGAGGTTGCGTCTAAAACCTTCTACA

ACACTCTGGGAAATTGTAGTGTTCTTATATCCAACATGTTTGGGCCAATGGAGCAGATGGCTTTGGCAAA

TCATCCTGTAAGTGGTGTTTATTTCGCTATGTCGGGTGGACCTCAGAATGTAAACGTAGAAATTATGAGC

TATGTGGGAGAATTAAGAATCACCTCGAAAACTCTTAAGGGATTTATAGATGAACAGAAATTCAAGTTTT

GCATAGAGAAAGCCTTTGATGAAATATTCAAAGATGCTATGGAGATCTACGAGATACCTAAATGGGACAT

ATATATGGAAATATTGATTAGTGGTGGCGCAGTGTAAGATTATAGTTTTACTTTCCTTCAGCGTCAGAAT

GCCACAAACCTCATCCAAGTTTATCTGTTTTGTAACTTCGGAATATTCTACAAACACTGTCTATTTTTCC

TTTTTATGGAATGTCCGTTGATGATATGAATTTTAATTGTATGCTTATATTGATTGTTTTCTATGGAATTCGTTTGTACATGCAAGATATTGACTACTTGACAAGAAAAGCAAAC

WS/DGATa2 Glyma.06G291700

>G.max Wm82.a4.v1|Glyma.06G291700.1
AGCCAAAAGATATCTTCTAATTGAAGTGCTACTTTCACTCTCATTTCCACACACAAACTAACACAATGGACCAATTCTATGAAGAGGTTCAAGAGCCAGTGAGTCCTCATGGACATTATTTCAACAGTTCGGTGATATGTTCCTATGTTTTTGGCTTTCTTGAAATGGCAGTTCCAATTGATGACTCACAGACTATACCTTTGCTTGAAGATGTCTTCCTCCCCATCAACCCACGTTTCTCCTCTATTATGATCAGAGACCAAGCTGGTAAAATGAGATGGAAAAGGGTGCAAGTGAATCCTGAAGAGCATGTAAAGGTTCCTAGATTTCCTGAATGCAATTCAGCAGAATTGTATGACCATTATTTTGATGAATATGTGACAAGGATTCTAAATGAACGGACACCTCAGAACAAGCCACTATGGGAAGTCCACCTTATTAAGTATCCAACAAGCAATGCTGCAGGCACAATAATTTTCAAATTTCATCATTCGCTTGGAGATGGTTATTCCCTCATGGGTGCCCTTCTTTCTTGCCTTCAAAGAACTGATGACCCTTCTCTTCCACTTACTTTTCCTTCAAGAGTATCATCAAATCCGCAGCATGCAAAGAAAACCATATTTAAGAAGTTACATTCAGTGATATCCTCCTTTTTTAGCTCCATGTTAGATTTTGGATCTAGCGTAATAAAGGCAAAAATGATTGAAGATGACAAAACACCCATAAGGTCTGGATATGAAGGAACTAAGCCTCAGCATTTCACCTTGTCAAACATATCATTATCTCTTGATCATATCAAAGCAATCAAGTCCAATCTTGGAGTGACAATAAATGATGTGATAACTGGGATAATTTTCTATGGGATTCGGTTGTACATGCAAGAGATTGACTACATGACAAGAAAAGCAAATTCCACAGCTTTGGTGGTGCTCAACACAAGGAATATTAGAGGGTACCAATCAGTGAAGGAGATGCAAAAACCAAAGGTCAAAGGTCTATGGGGGAATAAAATTTCTTTCTTACAAATACCAATTCCAAAGCTAGACCAACCCAAAATCTCCAACCCTCTTGAGTTTGTTTGGAATGCTCGTAAACAAATCAAGAGAAAGAAACATTCTTTCAGCGTTTATCTCATAGGTCTGCTTTTGGATTTGGAGATGAAATTAAGAGGCCCTGAGGTTGCATCTAAAACCTTCTACAATACTCTGGGAAACTGTAGTGTTCTTATATCCAACATGTTTGGGCCATTAGAGCAAATGGCTTTAGCAAATCATCCTGTAAGAGGTGTTTATTTCGCCATGTCTGGTGGACCTCAGAATGTAAACGTAGCAATTATGAGCTATGTGGGAGAATTAAGAATCACCTTGAAAACTCTAAAGGGATTCATAGATGAACAGAAATTCAAGTTTTGCATTGAGAAAGCCTTTGATGAAATATTCAAAGATGCTATGGAGATCTATGAGATACCCAACAAAATTTAATTGGGACATATGCAAATACTGATCTGTGGTGGTGCAGTTTGTAACTTCGGAATATTCTACGAACACTGTTTATTTTTCCTTTTTGTTGAATGTCCATTGATCATATGAATTTTAATTGTATGCTTATATATATATGTTGATTGTAATTTCGCCCCGCAAATTTCAATATCATATTATATATGTTTGCTTATTTCGGTTTAAGGTTTAAATAAGATATTTAAAAAATTTTATTTGACATCA

WS/DGATa3 Glyma.06G291300

>G.max Wm82.a4.v1|Glyma.06G291300.5
AGCCAAATATTATTTTCTAATATTTGAAGTTCTACTTTCACTCCCTTTTTTCATACACAAAATAGCACAATGGACCAACAATTCTATGAAGAGGTTCAAGAGCCAGTGAGTCCTCCTGGACAATATTTCAACAGTTCGGTGATATGTTCCTATGTTTTTGGCTTTCTTGAGATGGCAGTTCCAATTGATGACTCACAGACTATACCTTTGCTTAAAGATGTCTTCCTCCCTATCAACCCACGTTTCTCTTCTATTATGGTGAGAGACCAAGATGGTAGAATGAAATGGAAAAGGGTACAAGTGAAGCCTGAAGAGCATGTAAAGGTTCCCAAATTTCCTGAATGCAATTCACCTGAATTATATGACCAATATTTTGGTGACTACGTGACAAGGATTCTAACTGAACGGACACCTCAAAACAAACCACTATGGGAAATCCATATTATTAATTATCCAACAAGCAATGCTGCAGGCACATTAATTTTCAAGCTTCATCATGCGCTTGGAGATGGTTATTCTCTCATGGGTGCTCTTCTTTCTTGTCTTCAAAGAAGTGATGATCCTTCTCTTCCACTAACTTTTCCTTCAAGAACATCATCAAATTCACAGCAAGCAAAGAAAAGCATGTTTAAGAAGTTACCTTCATTTATATCCTCCTTTTTTAACTCCATGTCAGATTTTGGATCTAGCTTAATAAAGACAAGAATGATTGTAGATGACAAAACACCCTTAAGGTCTGGATATGAAGGAACTGTGTCTATGCCTTTCACCTTGTCACACATATCTTTATATATTGACAATATCAAAGCAATCAAGTCCAAGCTTGGAGTGACAATAAATGATGTGATTACTGGCTTGATTTTCTATGGGATTCGATTGTACATGCAAGAGATTGACCGCATGGCTAGAAAAGCAAATTCCACATGTGTGGTAATGCTTAACACAAGAAATGTTAGAGGGTACCAATCAGTGAAGGAGATGCAAAAATCAAAAGTCAAAGGTCTTTGGGGGAATAAAATTTCTTTCTTACAAGTACCAATTCCAAAGCTAGGCCAATCCAAAATCTCCAACCCTCTTGAGTTTATTTGGAATGCTCGTAAACAAATCAAGAAGAAGAGACGTTCTTTCAGTGTTTATCTCATAGGTCTGCTCTTGGATTTGGAGATGAAAATAAGAGGCCCTGAGGCTGTTGCTAAAATCATCTACAAGACTCTGCGAAACTCTAGTGTTGTTATATCCAACCTTTTTGGGCCAATGGAACAAATGACTTTGGCAAATCATCCAATAAGTGGTCTGTATTTCACCATGACTGGTGGACCTGAGAATGTAGACATAACAATTATGAGCTATGTGAAAGTAATAAGAATCACCTTGAGAACACTAAAGGGATTCGTTGATGAACAGAAATTCAAGTTTTGCATAGAGAAAGCCTATGATGTCATGTTCAAAGCTGCTATGGAGATCTCTGAGACACCCAACAAAAATTAATTGGGGCATATATGCAGATCTTGATCATATGCATTGCATGGGCAAATAACAGAATATCAATCATTCCAGAAAGAGTCACACGTACATTATTTCAAATTAAAACCATATAGCTGATTAATTATTGTATCTTAGTTTTACAAAAATATGAATATTGTTCTTTAAGGCAATGAAGATATAGAAATCCGGTGGAACTATTCATGATGCCGTTCCTCTTCAAAAACTTGCCATGTTACACTCATTTGTTTTGGTGTGGAAATTTTCTATTAATTAATTGAAAAAAAAATTTATTTTGT

WS/DGATa4 Glyma.12G114900

>G.max Wm82.a4.v1|Glyma.12G114900.1
TAAAGAACATGGTTTATCCTTCATTTTGTAAAAAAAAAATGATTTGCCCTTCATACACAACAATACAATTATCTAAAGCTATATATAAGTGATCATAGACAGACACATGTTCAATCTCCAAGTAGTACATAATTTAGTCTCTAATTTCTAAAACTCGTCAGTGCAATAGTATAATGGACAACTTCGAAGATGCTACAGAGCCAGTGAGTCCTAGTGGACGATTCTTCAACACCACGGTGCTATGTGCGTATGTTTTTGGCTTCTTAGAATCAGAAGTTCCAATTGAATTCTCTCAAGCCAAGTATTTGTTCGAAGATGTCTTTCTACCCGTCAATCCACACTTTTCTTCCATAATGGTGAGAGATGAAGAAGGAGAAATGAAATGGAAAAGGGTAGAGGTGAAGTTCGAAGATCACGTAAAGATTCCAACGTTCCCCGAAAACGAGTCACTAGAATTGTATGACCAATATTTTGATGACTATGTGACAAAGATATTAATGGAAAGGACACCACAAGATAAACCACTTTGGGAAATTCATGTGATCAAATACCCTACAAGCAATGCTGCTGGCACCTTAATATTCAAACTTCACCATGCACTTGGAGATGGTTACTCCCTAGTGGGTGCTCTTCTCTCTTGTCTTCAGAGAGCTGATGACCCTTCTCTTCCTCTTTCGTTTCCCTCCCGAAAATCCTCGGCATCTTCATCTCCTTCCAAGAAGGGCTTCTTCAGGTTGTTCTCTTCAACTTTGTTCTCCTTTTTTAACTCTATTTCGGATTTTGGATGGAGCATAGTGAAAAGCTCAATTGTTGAAGATGATGAGACACCCATAAGGAGTGGTGAGGAAGGTGTTGAGTCTCTGCCTTGTGTGATATCAAACATATCCTTTGATCTTGATCAAGTGAAGAAAATCAAGTCCAAGCTAGGAGTGACAGTAAACGATGTAATTACTGGGGCAATTTTCTATGGGATTAGGCTGTACATGCAAGAGATTGACAATAAGGCAGGCAAAGCAAATTCCACAGGATTGGTGATGCTTAGTACTAGAAACATTGGAAGTTACCAATCAATCCAAGAAATGATGAAGGCTGATTCCAAATCTCCTTGGGGGAATCATATTTCTTTCTTGCACGTACCCATACCTAAGCTAAGCCAAGCCAGCCTATCCAACCCCCTTGAATTTGTTTGGAAAGCCCAAAAAATAATCAAGAGGAAGAGAAAGTCTTTCACTGTTTTTCTCATTGAATGGCTTTTAGATATGGAGCTGAAATTAAGAGGACACGAGGCCGTGGCTAAACATATCTATGGGACACTAAGAAACTCAAGTGTTGTCGTATCCAACTTGATTGGACCAATAGAACCTATGGCTTTGGCAAATCATCCTGTGAAAGGCTTGTATTTCACAATGACTGGTGGACCCGAGAGTATAAATATTGCAGTTATAAGCTACACAAAAACGTTAAGAATTACCTTAAAAACACAGAAAGGGTTTATTGATGAGAAGAAGTTCAAATTCTGCGTGGTGAAAGCCTTTGAGGTCATATCCAAAGCAGCAATGGAGATACCCAACAAAATCAGAGGTTAAATGATCTAAGAATAATTAAAGAGATAGGGGTCGTCTAAGGGAGACTATATATGCTTGGGAGTATGTCCAAGTCAGTTTAATTTCATCAATAAGTAGAGATGGTGGATTCTAATTTTGTCAAGTGTTAGAATGAAATTTAAAAAATCGGCCACTCAAGGCAATAATAATAGCATACATATCGTATGTCCATGTAATTTCTTAGAACAGTGATATCTCCTCCCCGCAAAAGAAATGAAGGATCAATGTTTTCCTTCTTTAGCTTTATTTGATATATACTAAGTCTAGTTGAATTATGGATTTAATATCGCTTTTGGTATATTAGATTTTATAATTGTTTCAATTTAGTACATTAAACCTTATATTTATTAATCAATTT

WS/DGATa5 Glyma.18G258100

>G.max Wm82.a4.v1|Glyma.18G258100.1
AGGTTGTAAAACTTCAGTGGTTTTATAGCTTTTATCTCTCTCTCTCTCTCTGAACGTGACAAAAAATATAGCCTTATGGAATACCTAAAAGAGGAGCAAGAAGAACCAGTTAGTCCTATGGGACAATACTTCAACAGTTCTGTGCTATGCATATACATCATTGGAGTTTTGGAATTTGAAGTTCCCATACATGACTTGCAAACCTTCGCTCTTATTAAAGATGTTTTTCTTCCCATCAATCCACGCTTCTCCTCCGTCATGGTCCAAGATAAAGATGGAGAGAAACGATGGAAGCAAGTTGATGTGAATTTGAAAGAGCATGTCCACTTTCCCAAATTCCCCAAAGGCAAAACAGTGGAATCCTACGACAAGTTTTTCCATGATTATTTATCAAGCATGGCAATGGAGCAATTACCACAAAGCAAACCTCTATGGTCCATTCACATAATCAATTACCCCACAAATGATGCATCTAGCAGCATAATATTTAAGCTTCACCATGCACTTGGAGATGGTTATTCTCTCGTTGGTGCACTTCTTTCTTGTCTACAAAGAGCTGATGACCCCTCTCTACCCTTGTCATTTCCTTCTCTAAGACCATCAAAGCCACAATCATCAACCGAAAACTTTTGGAGAAGGTTTTCTTGGATGTGTTCCTCTGCCTTCAACACTGTCTCAGATTTTGGATGGAGTGTATTGAAGAGTAGCATCATTAGTGATGATGAAACACCAATAAGGTCAGGAGATGAAGGAACCGAGTTTCGCCCAATTTGCATATCAAGTATGGACTTCTCCATTGACCATATCAAGGACATCAAATCCAGGCTCGGAGTGACAATAAACGATGTGATCACTGGAATCGTGTTCTATGGGACTAGGTTATATATGCAAGACATGGACTCCAAGTCAAAAACGGCAGACTCCACTGCTTTGGTTTTATTGAATACGAGAAACATCGAAGGTTACCAATCAATAAATGAAATGCTGAATAATAAAGCCAAGGGTCCATGGGGGAATAAAATCTCCTTCTTGCATGTACCAATTCCAAAATTAAATCAAAACAAAATGTCAAACCCGTTAGATTTTATCTGGGACTCGCATAATATAATCAAGAGAAAGAAACAATCTTTAGCTGTTGCCCTCACTGGGATTCTTTTGGACACGGAGAGCAAATTCAGAGGACAAGAGGCAGTAGCTAAACACCTTCGAGGGACAGTAACGAAATCAAGTGCAGTGATTTCAAGCTTGGTTGGACCGATGCAACAAATGTCTTTAGCTAATCATCCAGTGAAAGGCTTATATTTCACATTGGCTGGTGGACCAGAGAGTCTTGCCATTTCAATTATGAGCTATGTGGGAGTGCTTAGAGTTACCCTAAAGACGGAAAAGGACTTTATAGATGAAGAGAAATTGAAGTCATGCATTCAAAGTGCATTTCAGATGATACTAGAAGCAGCTACAGCACATTCTTGACAAAACAAAACTTTAGTGTGTTCCTGATCTGCACAGAAGCTAAATTCTTATATTTGTTTGGAAAATTGGATTGATTGTTTTTTTTTTTTGTACAACTATCTTATTAGTTCATATATTTTTTATTAAGTTTTAATTTTTAAGGAATATATGTGTGTATGCTCTGAAACTTAATAAACGAGGTCCACTTATTATCTCTGTTGATTTTG

WS/DGATa6 Glyma.09G239600

>G.max Wm82.a4.v1|Glyma.09G239600.1
AATTTTGGTCTTGTCAAAGTAAAACCAGTTGGCACGTCTGTATCGGTTGCTTTTAGTCCTCAACCTCGTTCTGTGTGCTATACATATGGTTTCATTTCCCCCTTAATTCTCAACTCGTGAAACTTCCCAAAAAATATACAGCACTATGGAACACCAAAAAGAGGAGCAACTAGAACCAGTGAGTCCTGTGGGACAATACTTCAACAGCTCTGTGCTATGCATATACATCATTGGAGTTTTAGAATTCGAAGTTCCAATAGATGACTTGCAAACATATGCTCTTCTTAAAGATGTTTTCCTTCCCATCAATCCACGCTTCTCCTCCATCATGGTCCAAGATAAAGATGGAGAGAAAAGATGGAAGCAAGTTGATGTAAACTTGACGGACCATGTCAACATCCCCACATTCCCCGAAGGAAAAACAGCGGAATCTTATGATAAATATTTTCATGATTATTTATCAAGCATAGCAATGGAGCAATTACCACAAAGCAGACCATTATGGGATATTCACATAATCAATTACCTTACAAGTGATGCATCCAGCACTATAATATTTAAGCTTCACCATGCACTTGGAGATGGCTATTCTCTCATGGGTGCTCTTCTTTCTTGTCTTCAACGAGCCGATGACCCTTCTCTTCCCTTGTCCTTTCCTTCTCTCAAACAATCTAAACAAGAACCTTCTTCCACTAAAAGCTTTTGCAGAAAATTTTCTTGGATGTGTTCCTCTGCCTTCAACACTGTCTCAGATTTTGGATGGAGTGTATTGAAGAGTAGCATCATTAGTGATGATAAAACACCGATAAGGTTTGGAGACGAAGGAGCCGACTATCAACCAATTTCCATATCAAGCATGACATTCTCCATTGACCACATCAGGGACATCAAATCAAGGCTCGGAGTGACAATAAATGATGTGGTCACTGGAATTGTCTTCTATGGAACTAGATTATATATGCAAGATATGGACTCCAAATCAAAGACCGCACACTCCACAGCATTGGTATTACTGAATACGAGAAACGTTGAAGGTTACCAATCGATCAATGATATGCTAAATACTAAAGCCACGGGTCCATGGGGGAACAGAATTACCTTCTTGCATGTTCCAATACCGAAATTAAATGAAACAAGAACTACAAACCCTCTTGAATTTATTTGGGACACACATAACATAATCAAGAGGAAGAAACAATCTCTAGGAGTTGTACTCACCGGGACACTTTTGAAGATAGAGGGCAAATTGAGGGGACAAGAGGCAGTAGCTAAACGCATTCGTGGCACATTGACAAAATCAAGTGCAGTGATTTCAAACTTGGCTGGACCAATACAACAAATGGCTTTAGCTAACCATCCTGTGAAAGGCTTGTATTTCACATTGGCCGGTGGACCTGAAAGTCTAGTCATTTCAGTTATGAGCTATATGGGAGTCCTAAGTGTTACCCTCAAAACGGAAAAAGACTTCATAGACGAACATAAATTGAAGTTGTGCATGCAAAGTGCATTTGAGATAATTCTCCAAGCAGCTATGGAAATTCCTCAGGAAACCAAACCTTAGTATTTGGTTTGGATGATTGGAACAGCTTATTACGAAAATTAGAGAGAGAGAGAGATATGGAGAATTTACCATATTATTTCTCCGGATTTATCAACGCCTTAAGTAATTGCTTGTCTATAGTATATTTGTCGTATGTTTGGAAAGATCAATACACGAGGCCCACCTTATTTTGGATCTGTTTAGGCCTATTCTTGTTTGGAAGAATCTTATTGTCTGATCTCACTTGGTAATCATTTCTTGTTTGTTTCACAAACTAAAAAGTGTACAAGAGTTGTTATATTTTTAATTATGTAGTCTTTTGTAAAAATTTTGTACATC

WS/DGATa7 Glyma.18G257900

>G.max Wm82.a4.v1|Glyma.18G257900.1
TGTTCTCATATATAGTTGAATCATTCTTGCGCTATAACACTTTCGTTCCTATCAAAGTAAAACCAGTTGGCACGTCTGTATCGGTTGCTTTTAGTCCTCACCCTCATTCTGTGTACTATATATATGGTTTCATTTCCCCCTTAATTCTCAAGTCGTGAAACTACACAAAAAAGTATACAGCACTATGGAACACCAAAAGGAGGAGCAAGCAGAACCAGTGAGTCCTGTGGGACAATACTTCAACAGCTCTGTGCTATGCATATACATCATTGGAGTTTTAGAATTCGAAGTTCCAATTGATGACTTGCAAACATATGCTCTTCTCAAAGATGTTTTCCTTCCCATCAATCCACGCTTCTCCTCCATCATGGTTCAAGATAAAGATGGAGAGAAACGATGGAAGCAAGTTGCTGTAAACTTGAAGGACCATGTGAAGATCCCCACATTCCCCGAAGGCAAAACAGTGGAAACCTATGACAAATATTTTCAAGATTATTTATCAAGCATAGCAATGGAGCAGTTACCACAAAGCAGACCATTATGGGATATTCACATAATCAATCACCGTACAAGTGATGCATCCAGCACTATAATATTTAAACTTCACCATGCACTTGGAGATGGCTATTCTCTTATGGGTGCACTTCTTTCTTGTCTACAACGAGCCGACAACCCTTCTCTTCCATTGTCCTTCCCTTCTCTCAAACAATCTAAACCAGAACCTTCCACTAAAAGCTTTAGCAGAAAAATTTCTTGGATGTGTTCCTCTGCCTTCAACACTGTCTCAGATTTTGGTTGGAGTGTATTGAAGAGTAGCATCATTACTGATGATAAAACGCCAATAAGGTTTGGAGACGAAGGAGCCGACTTTCAACCAATTTCTATATCAAGCATGACATTCTCCATTGACCATATCAGGGAAATCAAATCAAGGCTTGAAGTGACTATAAATGATGTGGTCACTGGAATTATCTTCTATGGGACTCGATTATATATGCAAGATATTGACTCCAAATCAAAGACAGCACAATCCACAGCATTGGTATTACTGAATACGAGAAACATTGAAGGTTACCAATCAATCAATGACATGCTCAATACTAAAGCAAAGGGTCCATGGGGGAACAGAATTACCTTCTTGCATGTTCCAATACCAAAATTAAATGAAACCAGAAATTCAAACCCTCTTGAATTTGTTTGGGACTCACATAATATAATCAAGAGGAAGAAACAATCTCTAGGAGTTGTACTCACCGGGACACTTCTGGAGATAGAAGGCAAATTGAGGGGACAAGAGGCAGTGGCTAAACGCATTCGTGGCACATTGACAAAATCAAGTGCAGTGATTTCAAACTTGGTTGGACCAATACAACAAATGGCTTTAGCTAACCATCCTGTGAAAGGCTTGTATTTCACATTGGCTGGTGGACCTGAGAGTCTAGTCATTTCAATTATGAGCTATATGGGAGTGCTTAGAGTTACCCTCAAAACGGAAAAAGGCTTCATAGACGAACATAAATTGAAGTCGTGCATGCAAAGTGCATTTGATAAAATTCTCCAAGCAGCTATGGAAATTACCAAACATTAGTATTTGGTTTGGATGATTGGAACAGCTTATTACGAAAATTAGAGAGAGAGAGAGAGAGAGGGATGGAGAATTTACCATCTTATTATTTCTCCGGATTTATCAACGCCTTAATTAATTGCTTGTCTATAGTATATTTGTCGTATGTGTGATATGGAAAAATCAATTCACAAGGCCCACCTTATCTTGGATCTGTTCGGGATTCCTGTTCGGAAGAATCTCATCCGTCTATCTCAGTTTGTAATCATAAGTTTCTTGTTTGTTTCACAAACTATAATGTACAAGAGTTATTATATTTTTAATTTAATGTCTTTTGTAATTTATTTCTTTTTTTCTTCATCACATTAAGAGGTGCATGACTCCTACCAACCTACGTGGCATCTCTCCACTCCTTGTCTTGAATCTCGAATGTTTTCTTATCC

WS/DGATb1 Glyma.13G295900

>G.max Wm82.a4.v1|Glyma.13G295900.1
AACCTACTCGTGCTTTCCATGTTTTGCAGACTAATTAGCTAAAAATAAACAAATTACTGAGAAGAAAAAATGAACTGCTTTGAGGAAGTTGTTCCAACGCCTCTGAGTCCTATGGCAGATTACTTGAGCAGCTCTTTGATAAACGTATTCGTTCTTGGTGTTCTTGAATCTGAGATTCCCATTGATGATTCAAGAGCCGAACCTCTGCTTAAGAACGCGTTCCTTCCCATCTCCACGCGCTTCTCTTCTATCTTGGTTATGGACAAGAAGGGAAACAAAGGATGGAAACAAGTTGATGTTAATGTGAAGGAACACATCAAGATTCCTACATTTACATATACCATGCCACTCAAATTATACGACGAGTGTCTTGATGAATACATGTCAAAAATAGCTATGGAACAGTTACCACTAGATAAACCGCTTTGGGAAATGCATATATTCAAGTATCCAACAAGCAATGCTGCGGGAACTTTTATATTTAAGCTCCATCATGCACTTGGAGATGGCTACTCTTTCATGACAACTTTGCTTTCATGCGTGCAAAATGCTGAGAATCCTTCTGTTCCTATAAAATTTCCTTCGAGCCGATCAGTGGAATCAAAAAGTACCAAAATCATGCCAAAATTATTACCTCAAACTGTCTCTATGATGTTTAAGAGTGCATTCGATTTTGGATGGAGTCTGTTAAAAGATAGCCTGATTCCAGATGATCAAACACCAATAAGGTCAGGTCATAAAGATGTAGGTTTTCGACCTATGAGTGTCACAGATGTTTCTCTCTCTCTGGGTAACATCAAAGAAGTTAAAGATAAACTCAAAGTGAGCGTAAATGATGTCTTGGTTGGGGTAATTTTCCTTGGCATTCAACTATACATGAGTGCAAAGAACCATAAATCAAGCAGAGCAGAGAGTACAGCATTGGTGCTGCTCAATACCAGGAAAATTAGAGCTTACAAATCTGCGGAGATGATGGATCATACCAATTCCGAGGCACCTTGGGGGAATAGATTCCACTTCATGCATGTTCCCATGCCTATGTTAAGTGATACCAATTACTTGAACCCACTTGAGTATGTGTTAGAAGCCAACAAAAATATCAACAGGAAGAGGAATTCTTTGGCCGTACCGTTGACCGGAGTGCTTTTGCGCTTGTTGAACAAAATCAGAGGCCCCCAGGCTGCTACAAACTACGTGTACAAGATATTGAATAATACAAGTTTAAGCATCTCACACATGGTTGGACCAATGGAAAAAGTGGCTTTGGCTAACCATCCTATCAAAGGCTTATACTTTATGACTGTTGGTTTATCTCAGAGCATCACAGTGACTATAACAAGTTACATGGGATATTTGCGAGTTGGATTTGGAGTAGAGGAAGGCTTCATAGACGAATACCAGCTCAAGTCATGTTTCGAAACCTCTCTGGAGATGATACTGAAAGCAGCAAAAAATGTTGCGAAAACTAGATTATAGATCAAAGCATGGAAGTCATCTCGTACTACAATGTTGTCGCGTATTTAATTTGAAATATATGTTTTATAGCCTACATAGGTTTGATGTCGTTCTTAAAAAAAAGGTTTATTATCGTCCTACCGATCTTGGTTTCAATAAAAACGCCGTCTTGGTTGCGTTTAAGAGAAAAAGAGTGTTGCAGATTGAAAAACAGTAATTTACCCTTTTCTCTGGTGTGAAAGGAGTAGGAAAAAAAATTGGTGTGACGTGTGACAATAATAAATGTATGGTGTTTTTTTTTAAGAGGAAATGTATGGTGACTTCTTTTTTACTGCAAATGTATTGTGAATTATGTACTGTT

WS/DGATb2 Glyma.19G046000

>G.max Wm82.a4.v1|Glyma.19G046000.1
CTCAACAACAAAACTTATTCTAACACTATAGTACTACTCTTTTTTTCTTGCCTGAAGTGAAGGAATAATGGAAAGATTTCATGAGGAAGAAATTGAAGAGCCAGTGAGTCCAACAGGGCAATACTTGACAAGCTCTTCACTAAGTGTGTACATTCTTGGTGTCTTGGAAAGTGAGGTTCCCATTGATGACTCTCAAACCGTGCCACTTCTTCAGAATCTCTTCCTTCCCATCAACTCACGTTTCTCCTCCATCATGATTAGGGACAAAAATGGGGAGAAGAAGTGGAAGAAAGTTGAAGTTAAGCTGGAGGACCATATCAAAGTTCCTACATTTCCCAATGGCAAGTCATCCAACTTGTTCTTATATGATGAATACCTTGATGAGTACATGTCCACAATAGCTGTGGAACATTTACCACAAAATAGGCCACTATGGGAACTTCACATTATAAAATACCCAACAAGCAATGCTAAGGGTACCTTGGTGTTCAAACTCCACCATGCCCTTGGGGATGGTTTTTCTCTCATGGGTGCCCTTCTTTCATGCATGCAAAGAGCTGACAACACCTCTCTTCCCTTCACACTCCCATCAAGCCAAAGGCCCAAAGCATCATCAATTTCCAACACCAAAGGGTTTTTCAAGAAATTGCCCTCCATTTTCTTCCAAACTATATCCGAATTTGGATGGAGTTTCTTGAAAAGTAAGTTGATTGAAGATGATCAAACACCAATAAGGTCTTGTGCGGAAGACTTCAAGACTCGCCAAATGACCATCTCAGATGTCACCTTCTCATTGGATCTTATCAAAGACGTGAAATCCAAACTTGGAGTGAGCATAAATGATGTGCTTGCTGGAGTAATTTTTTTTGGCATTCGGCTATACATGCAAGAAATTAATCTGAAATCAAGCCAAACCCAATCCACAGCATTGGTGTTGCTGAACACAAGAAACATTGAAGGTTACAAGTCTGTTAAGGAGATGATTGAGAAGACCAATAGTCGTTCTGCATGGGGGAATCAATATGCCTTTTTGCATGTTTCAATTCCAGAGCTTAGTGACTCCAAATATGCAAACCCACTTGAGTTTATAAGGGAAGCCCATAAGGATATGACCAAAAAGAAAAATTCTTTGGCCACTCCTCTCACTGGCATGCTTCTAGATATGCTCAGAAAACTCAGAGGTCCTGAGGCTGCAGCTAGCTACTTACGCAGTACTTTGAGAAACTCAAGCACAACAATCTCAAACATCATTGGACCAGTGGAGCAAATGGCTGTGGCTAATCATCCAATTAAAGGGTTTTACTTCATGGTAGCTGGTTCACCTGAGAGTCTCACCATGACGATCATGAGCTACATGGGAAAGATAAGAATTGCATTTGGAGTAGAGAAGAACTTCATCGACAAGCAATTATTCAAGTCGTGTTTGGAGAATTCTCTTGAGATGATAAAGGAAGCAGCAAAAAAGATTTCCGCATAAAATCAAATATGGAAGATATGTACTTTTTTTGTTGTTGTTGTGGAAGATATGTACTACCACTATATTCTATCTATATTCTTGTTAATATTTAATTATTTTATTTAAATATATGTGATGTGGTGATTCTGTAATAGAAATTTGTTTCTGAGTGGAATGTATTTTATTGAACTGGAACAGTATCATTACGGCCGGGCATGGCTGTTTTTAGTTGGGAAGTCCCTACATTACATCAAAAAGTAGAATTAAAAATGTTTTTTTTTGTTTGATTTTTATTTGTATTCGATTGTAATATGAGTTATGCCCTCAAATTTGTCTTGAAATTCAATTTGAAATGAAAGCGTTG

WS/DGATb3 Glyma.13G046600

>G.max Wm82.a4.v1|Glyma.13G046600.1
AGTCTCTCTTCCCATTGTATATATCTGGCCCCAACTCAAGAAACTGAATCTCAACAACAAAACTTATTGTCACACTCCAACCTAGCTAGCTTTTTTCTTCTTGCTTGTTATAAGTGAAAGGATGGAAAGATTTGATGGAGAAGAAATTGAAGAGCCAGTGAGTCCAACAGGGCAATACTTGACAAGCTCTTCACTGAGTGTGTACATTCTTGGTGTCTTGGAAACTGAGGTTCCCATCGATGACTCTCAAACCGTGCCACTGCTTCAGAATCTCTTCCTTCCCATCAACTCACGTTTCTCGTCCATCATGATTAGGGACAAAAATGGGGAGAAAAAGTGGGAAAAAGTTGAAGTTAAGCTGGAGGACCATATCAAAGTTCCTACATTTCCCAATGGCAAGTCATCCAACTTCTTATATGATGAATACCTTGATGAGTACCTGTCCACAATAGCTGTGGAACATTTGCCACATAATAGGCCACTATGGGAACTTCACATTATTAAATACCCAACAAACAATGCTAAGGGTACCTTGGTGTTCAAACTCCACCATGCCCTTGGGGATGGCTTCTCTCTCATGGGTGCCCTTCTTTCATGCATGCAAAGAGCTGACAACACCTCTCTTCCCTTCACACTCCCATCAAGCCTAAGACCCAAAGCATCAATTTCCAACACCAAAGGGGTTTTCAAGAAATTGCCCTCCATTTTCTTCCAAACCATATCCGAATTTGGATGGAGTTTCTTGAAAAGTAACATGATTGAAGATGATCAAACACCAATAAGGTCTTGTGCGGAAGACTTCAAGACTCGCCAAATTACCATCTCAGATGTCACCTTCTCCTTGGATCTTATCAAAGAAGTGAAATCCAAACTTGGAGTGAGCATAAATGATGTGCTTGCCGGGGTAATTTTTTTTGGCATTCGGCTATACATGCAAGAAATTAATCTGAAATCGAGCCAAACCCAATCCACAGCACTGGTGTTGCTGAACACAAGAAATATTGAAGGTTACAAGTCTGTTAAGGAGATGATTAACAAGACCAATAGTCGTTCTTCATGGGGGAATCAATATGCCTTTTTGCATGTTCCAATTCCAGAGCTTAGTGATTCCAAATATGCAAACCCACTTGAGTTTATAAGGGAAGCCCATATGGATATGACCAAAAAGAAAAATTCTTTGGCCACTCCTCTCACTGGCATGCTTCTAGATATGCTCAGAAAACTCAGAGGTCCTGAGGCTGCAGCTAGATACCTGCGCAATACTTTAAGAAACTCAAGCACAACAATCTCAAACATCATTGGACCAGTGGAGCAAATGGCTGTGGCTAATCATCCAATTAAAGGGTTTTACTTCATGGTAGCTGGTTCACCTGAGAGTCTCACCATGACGATCATGAGCTACATGGGAAAGATAAGAATTGCATTTGGAGTAGAGAAGGACTTCATCGACAAGCAATTATTCAAGTCGTGTTTGGAGAATTCTCTTGAGATGATAAAGGAAGCAGCAAAAAAGATTTCGACATAAAACTAATCAAATATGGAAGATAAGTACTACCATTATATTCTATTGTTAACATATAATTATTTTATTTAAATATATGTGATGTAATGATTCTGTAATAGAATTTTGTTTGTGTGTGAAACGTATTTTTATTGAACTTGAACAGTATCATC

WS/DGATc1 Glyma.07G000300

>G.max Wm82.a4.v1|Glyma.07G000300.1
GGTCACATTTTATTATAGAATTAACTAAAGTAGGAATGAAATAATAGGGGGGGGGGAGAGATATATCATACGACTGAGTCTAGAGGGTGTGTGAATAGAGAGAGTGATGGGTGAGAGGGGGGACGAAGCTGTAACCCCGGCGGGGAGGCTGTTCCTGCAGGCAGAAATGAAACAAGTAATCCACTGCGTCATAGGGCTGAAGAACCCCATCGACGCGGAGCTAGTGAAATCACAAGTCCGGAACTCTACTATGCTACAACACCCACGCTTCACGAGTCTGATGGTAAGAGGCGAAGGAGGAGTGGAGCACTGGCGGCCCACCGAAATCGACATCGATCGGCACGTGCTTATAATAGAGGAAGCAGTGGGCGAGAGGGAGGAGGAGGATGAATCGGCCATCAACAAGTACCTGGCCGAATTATCCATAGACAGCGATGGGCTTAGCATGGAGAAGCCCCTGTGGGAAATCCATCTTCTTAAGGCCCACAAGTGCGTTATTTTCCGAATCCATCACGCCCTCGGGGATGGGATTTCCTTGATGTCCATGCTTCTCGCCAGCTGCAGGAAACTCAACAACCCAAACGCCCTCCCTACCATCGCCGCCTCTGCCTCTACCTCTGCCTCTACCTCTGCCTCTAAAACTAACCTCATCAATTTCCGGAATCTCCTCGCTACCCTCTGGTTTTGTTTCATCTTTGCCCTCGAGTTCATCCTCAGGTGTTTGTGGATTCGTGACCCCAAATCCGCCTTAACCGGTGGCGCTGGGGTTGAGCTCTGGCCCAGGAAGATAGCTACTGCCACTTTCTCCTTAGAAGACATGAAGACCGTCAAGACTGCTGCTAATGCGACCATAAATGATGTTCTATTTGCAGTTATATCATCTGGGATATCAAGATACCTAGACTTTCGAGCACCTAATGGGCTGCGAGATGGTGTTCAGCTAACAGGTTTAGCTATGGTTAATTTAAGAAAGCATCCAGGATTACAGGAATTATCCAATATGATGAGAAGTAATTCAGGAGCAAGGTGGGGTAACAAATTTGGTATGATTCTCTTGCCTATATATTACCATAGAACCAACACTTCAGATCCTTTAGAATATCTGAAGAGAGCTAAGGCAATGATTGACAGAAAGAAACGATCTCTAGAAGCCAGTTTCTCATACAAAATTGGGGATTTTGTAATGTCCACCCTTGGTCCAAAGTTTGCTAGCCTTCTAAATTATCGGATACTCTGCCACACTTCCTTCACTATCTCAAATGTGGTTGGCCCGCAAGAGGAGATTATGATTGGAGGCAATCCTATAACGTTCTTAAGGGCAAATAATTCTGCCTTGCCTCATGCTCTCATTTTGAATATGGTGAGCTATGCTGGAAGAGCAGACATGCAAGTGCAGGTGGCCAAAGACATCATTCCTGATCCTGAGTTTCTTGCCAAGTGTTTTGAAGATGCATTGCTTGAAATGAAGGAGCAGGTTACGGCCAAAATCTGACATTTGGAGAAATTTGATTTTGTTAAATGTTACAACATTGCTATGAATATTGAGATACATATAATCACAAGCAACATAATTTACATTGGGATAACATTTACTTTCTTAATAAATGTTATATAGGGACTTATTTGATACATCTAGTTCTCTCATATGTACCATTGATGGTTGTATGACCTATTAATACATAAGTTGAAAGGATTTGAAGCATATTATTAAAATGCATTTCATGTTTGCTT

WS/DGATc2 Glyma.09G196400

>G.max Wm82.a4.v1|Glyma.09G196400.1
AAACAAAATGCAAAATTATTCAAAAAGCCGCCACCATTTGACTTTGAAATGCCCATATCCTCACAAATTTATTAACTTTGGTGGTTTTGATTACATTATAAACCACCCTACCCTGCCCCTTGTGAGAACACAGCAAACAATCTTTGCATCTTGAATGAAAAAAAGGGAGCAACTATGGCATCCAGAGAAAGAGAGGGTGAACCACTGAGTCCAACAGGGAAGCTGTTCCATGAGCCATCTTTAAACTGTTATGTGATTGCCATCATGGGTTGCAAGACAAGCATCAATCCTCAAGTCATTCGAGAAGGTTTATGTCAAACACTGCTCAAGCATCCCAGGTTCACCAGCAAACTGGTTAAGAAGGGAAGGAAAACGAAATGGATCCCAACAAAAGTTGACTTAGACAACCATATCATAGTTCCTGAAATAGATTCCAACTTAGAGTACCCAGATAGATTTGTGGAAGACTATGTCTCCCATTTCACCAAAACTCCACTAGACCAATCCAAGCCACTATGGGAACTACACCTCCTCAACATCAAAACCTCGGACGCAGAAGCTGTTAGCGTATTTCGGATTCATCATTCCATAGGCGATGGTGCCTCTCTCATATCACTCCTTCTTGCTGCCACTCGCAAAACTTCTGACCCTAATGCGTTGCCAACTGTGCCAATCCCAAAGAAAGACACCTCACATCAACGCTCATCAAGCCCATTCCGGTGGCTCTTCGTAATTTGGTGGGCACTACTTCTCATTTGGCACACTTTCGTGGATATGTTGTTGTTTACTTTCACCATTTTCTTCATCAAAGACACACCAACTCCTCTCAAAGCTGGTGCGCTAGGGGTTGAACTACATAACAAGCGCATTGTCCATCGCACAGTTAGTATGGATGATATCAAGCTCGTGAAGAATGAAATGAAAACGACAATCAATGATGTTTTATTGGGAGTAACACAAGCCGCTCTCACTCGCTACTTGAATCGAGCATATGCAGATGTAGGCGCAAATAGCAACGGTGTGAAACAGAGATCTAGTGTCCTCAAGAAGATTCGCCTTAGGGCATCAATTCTTGTTAACATTAGACCTGTTGGTGGAATACAGGAACTAGCAGATATGATGGCAGAGAAATCAAAAGTCAAATGGGGTAATTGCATGGGATACATCATCCTCCCTTTCTCTATTGTTTTGTATAAAGATCCATTGGAATATGTACGTCATGCTAAGGCCACAATAGACCGAAAGAAGCACTCATTAGAAGCAATTTGCTCTTATGCTTGTGCAAAGCTGGTACTCAATTTATTAGGTGTAAAGGTTGCTGCTGCCATAACACGAAGAGTTCTCTTTAACACTACTGTAGCCTTCTCCAATGTGCCTGGTCCTGTGGAAGAAATTAGCTTCTATGGTCATCCCGTGGCATACATTGCTCCTAGTGTATATGGACACCCACTTGCACTGACCATCCATTTTCAAAGCTATGCTAACAACATGACCATTTCTCTAGCAGTGGACCCACTTGTTATTTCGGATCCTTACCTTCTTTGTGATGATTTAGAACAATCACTCAAACTCATTCGTGATGCTATTCAGAAAAAGCACACTGTCGATGCTGTCTAATAGTATATGGTCTAATTATGAGATTTTAGGAAATTGGACAACTACTGATTATTTTTCATTTGAAATGCAATTTATATGAATTTTTTAAACTTATAATTGGTGTATCATAATATTCGTAAACTTATAGAAAAAATAAGGAT

cytoDGAT Glyma.13G118300

>G.max Wm82.a4.v1|Glyma.13G118300.1
ACCGAACGAAAGTGCGCGCCACGTCATCAATGCCCAATAAGAGAGCTGAAAAAAGACGCCTCCAACCAAAAACCAAAACAGAGTAGTTTGCATCGCCGTCGTCAACCATGGAGATCTCCGGCAGCGTTCTCCGCCAGCTCAGCTACGTCTCCGGCTATGGGACCCCCACGCGTTCCCGTGGCGTGGCTTCTCGTGTTGGGCTGAGAATGGGGACGGGTTCTGGTTTCTGTGACGAGGGGCATCTGCAGTATTACCAGGACACCAAAAAGATTCTGACCCCTAAGAAGTTGAAATTGCTCAAGGGTTTCTCCAAATTAGGGCTTGCATCGGATCCCGAGAAACTTGCCATGTTCCATGATCTTCAACAAAACCTCACCTCGGATGCTGGAGAGGTGTTACTGAGAGAGTTAGAAGCAGCAAGAGCAAAGGAGAAGGAAATGAAGAAAAAAAGAAAGCAAGAGATAAAGGCCAAACTCAAAGCCTCCAAGATGAATTGTGAATCTTCTTCATCTTCATCGTCTGAATCAAGTGACAGTGATGGTGATTGTGATCAAGTGGTTGACATGAACTGCTTCAGAGCTGGTGCTGGTGTTGTTGTCCCTGCACCTGTGGAGGAATCCCCACTGCCCAAGACCCCCATTGTTGAGGATACAAATGCAAAGGCGCATCGTGATGCCATGGCATTGTGTTCTAAGAATGATATCTCTGTTAGCAGTGTTAGAGATTGTATTAAGAGCGAGAGTGCTGTTGTTACCGCTGCTCCTCAAAAGAGGATTGAGGTCTGCATGGGTACCAAGTGCAAAAGATCAGGGGCTGCTGCACTGATGCAAGAGTTTGAGAGAGTGGTGGGTGTCGAAGGTGGTGCTGTTGTTTCATGCAAGTGCATGGGCAAGTGCAAAACTGCTCCTAATGTTAAAGTTCAGAATTCTGTCGATCATAGCCTTGCTCGAGGACTCGATGATTCTGTTAACATTCCTGCTAACCCTCTCTGCATTGGAGTTGGCTTGGGGGATGTGGATGCCATTGTGGCTAGATTTTTGGGAGAGAGTCACACAGATATAGGTATGATAGGTGCAGCTACAGCTACTTGATGTTGTTGTGGAAAAGGCTAGTGTGCTATTTGTAATTGTATATATACTTAGCCAGTATGCTGAGGAAACATTATTGGCAATGATTTTTTTTTTTTATTGTTCATATTGTATATAAACTAGTTGTTTTGAAGTTTCATTTCCTTGTTTATTGGGAATGCTATTTAATTGTTTCACTCTT
