# Supplementary material for: Genome-wide identification and expression analysis of diacylglycerol acyltransferase genes in soybean ( Glycine max )
Source: PeerJ journal article supplement (doi:10.7717/peerj.14941), 2023-03-20
Supplement: Ka_Ks.xlsx [file Ka_Ks.xlsx]

## Sheet: Sheet1
Sequence	Method	Ka	Ks	Ka/Ks	P-Value(Fisher)	Length	S-Sites	N-Sites	Substitutions	S-Substitutions	N-Substitutions	Divergence-Time	Substitution-Rate-Ratio(rTC:rAG:rTA:rCG:rTG:rCA/rCA)
Glyma_12G114400_2&Glyma_12G114900_1	YN	2.49561	2.2784	1.09533	0.750202	678	138.641	539.359	489	98.9963	390.004	2.4512	1.02259:1.02259:1:1:1:1
Glyma_12G114400_2&Glyma_18G258100_1	YN	3.58974	2.10382	1.7063	0.00921222	642	149.2	492.8	461	94.4839	366.516	3.24441	1.68425:1.68425:1:1:1:1
Glyma_12G114400_2&Glyma_09G195400_1	YN	4.39881	1.52947	2.87604	0.0130397	465	112.49	352.51	345	73.3893	271.611	3.70468	2:2:1:1:1:1
Glyma_12G114400_2&Glyma_16G115700_1	YN	2.60736	1.64226	1.58767	0.196713	483	116.007	366.993	344	77.2644	266.736	2.37556	1.66359:1.66359:1:1:1:1
Glyma_12G114400_2&Glyma_03G243700_1	YN	4.47333	1.40822	3.17659	5.04e-05	522	132.666	389.334	387	80.0558	306.944	3.69433	2:2:1:1:1:1
Glyma_12G114400_2&Glyma_13G118300_1	YN	3.95806	2.12256	1.86475	0.0902684	264	68.1384	195.862	206	48.0882	157.912	3.48432	2:2:1:1:1:1
Glyma_12G114400_2&Glyma_13G106100_1	YN	4.43905	2.37998	1.86516	0.00495845	507	135.062	371.938	382	89.5924	292.408	3.89052	2:2:1:1:1:1
Glyma_06G291700_1&Glyma_12G114900_1	YN	5.19817	1.25991	4.12582	1.77e-12	1404	380.589	1023.41	994	214.949	779.051	4.13061	4.04061:4.04061:1:1:1:1
Glyma_06G291700_1&Glyma_18G258100_1	YN	5.12998	1.35038	3.79893	1.27e-10	1281	346.534	934.466	911	199.345	711.655	4.10753	3.48649:3.48649:1:1:1:1
Glyma_06G291700_1&Glyma_09G195400_1	YN	2.38908	1.85822	1.28568	0.603484	879	207.878	671.122	615	142.821	472.179	2.26353	1.83194:1.83194:1:1:1:1
Glyma_06G291700_1&Glyma_16G115700_1	YN	4.94156	2.4264	2.03658	1.23e-05	969	242.131	726.869	708	150.536	557.464	4.31308	2:2:1:1:1:1
Glyma_06G291700_1&Glyma_03G243700_1	YN	5.10157	1.86301	2.73834	1.27e-06	1191	291.272	899.728	860	177.941	682.059	4.30954	2:2:1:1:1:1
Glyma_06G291700_1&Glyma_13G118300_1	YN	2.79127	1.7614	1.58469	0.243102	804	200.222	603.778	570	135.824	434.176	2.5348	2.17667:2.17667:1:1:1:1
Glyma_06G291700_1&Glyma_13G106100_1	YN	4.33588	2.48036	1.74809	0.00084324	1092	275.091	816.909	784	175.473	608.527	3.86845	2:2:1:1:1:1
Glyma_06G291300_5&Glyma_18G258100_1	YN	3.32001	1.71058	1.94087	1.33e-06	1317	328.988	988.012	929	196.849	732.151	2.91797	2.74345:2.74345:1:1:1:1
Glyma_06G291300_5&Glyma_13G295900_1	YN	3.14162	2.06244	1.52326	0.831172	1410	303.366	1106.63	995	212.978	782.022	2.90943	1.40647:1.40647:1:1:1:1
Glyma_06G291300_5&Glyma_09G196400_1	YN	2.16485	3.04856	0.710121	0.364588	1305	270.696	1034.3	932	199.537	732.463	2.34816	1.18447:1.18447:1:1:1:1
Glyma_06G291300_5&Glyma_03G243700_1	YN	5.12203	1.8672	2.74317	1.15e-05	1227	302.383	924.617	905	193.438	711.562	4.31991	3.16998:3.16998:1:1:1:1
Glyma_06G291300_5&Glyma_13G118300_1	YN	2.99869	1.97418	1.51896	0.296858	822	178.923	643.077	598	124.542	473.458	2.77569	1.42013:1.42013:1:1:1:1
Glyma_06G291300_5&|Glyma_09G065300_1	YN	5.12059	1.63291	3.13586	0.000911745	1227	304.158	922.842	906	202.26	703.74	4.25604	2.13435:2.13435:1:1:1:1
Glyma_12G114900_1&Glyma_18G257900_1	YN	0.55764	0.559646	0.996414	0.633266	1596	391.057	1204.94	620	147.991	472.009	0.558131	2.46549:2.46549:1:1:1:1
Glyma_12G114900_1&Glyma_07G000300_1	YN	5.17801	1.41729	3.65347	2.69e-10	1371	374.73	996.27	986	221.796	764.204	4.15011	3.49928:3.49928:1:1:1:1
Glyma_12G114900_1&Glyma_01G156000_1	YN	4.96424	1.41007	3.52056	2.46e-05	1005	255.815	749.185	741	162.588	578.412	4.05955	2.56818:2.56818:1:1:1:1
Glyma_12G114900_1&Glyma_09G195400_1	YN	4.80965	0.762544	6.30738	6.52e-41	915	305.358	609.642	672	138.268	533.732	3.45904	33.1946:33.1946:1:1:1:1
Glyma_12G114900_1&Glyma_16G115700_1	YN	1.99554	1.54655	1.29032	0.294473	969	233.308	735.692	661	152.725	508.275	1.88744	1.87646:1.87646:1:1:1:1
Glyma_12G114900_1&Glyma_19G241200_1	YN	5.18399	2.36495	2.19201	2.2e-06	1329	324.758	1004.24	962	201.41	760.59	4.49512	2.07979:2.07979:1:1:1:1
Glyma_12G114900_1&Glyma_16G051300_1	YN	5.14917	1.81489	2.83718	1.27e-05	1266	307.32	958.68	922	193.485	728.515	4.33977	2:2:1:1:1:1
Glyma_12G114900_1&Glyma_19G099400_5	YN	5.13343	1.5755	3.25829	0.000387004	1239	300.221	938.779	913	197.611	715.389	4.27131	2:2:1:1:1:1
Glyma_12G114900_1&Glyma_13G106100_1	YN	2.36192	1.50902	1.5652	0.0279621	1146	273.622	872.378	804	177.776	626.224	2.15828	1.59686:1.59686:1:1:1:1
Glyma_12G114900_1&Glyma_17G053300_1	YN	2.80012	1.95766	1.43034	0.000786381	1164	288.38	875.62	822	180.987	641.013	2.5914	1.98999:1.98999:1:1:1:1
Glyma_18G258100_1&Glyma_09G239600_1	YN	2.50606	2.91784	0.858876	0.000445716	1380	331.093	1048.91	964	205.158	758.842	2.60486	2.03035:2.03035:1:1:1:1
Glyma_18G258100_1&Glyma_18G257900_1	YN	5.18637	1.3284	3.90422	8.05e-06	1326	318.563	1007.44	957	198.275	758.725	4.25952	2:2:1:1:1:1
Glyma_18G258100_1&Glyma_13G046600_1	YN	5.14895	1.28492	4.00721	8.42e-13	1308	349.602	958.398	927	194.772	732.228	4.11617	4.33362:4.33362:1:1:1:1
Glyma_18G258100_1&Glyma_07G000300_1	YN	3.03131	1.67349	1.81136	0.0197255	1317	332.496	984.504	948	222.593	725.407	2.68851	1.98832:1.98832:1:1:1:1
Glyma_18G258100_1&Glyma_01G156000_1	YN	4.91323	1.2586	3.90371	4.92e-09	918	218.077	699.923	683	128.551	554.449	4.04505	2:2:1:1:1:1
Glyma_18G258100_1&Glyma_11G088800_1	YN	2.05973	1.64584	1.25147	0.107565	525	111.714	413.286	360	69.9245	290.075	1.97166	0.88586:0.88586:1:1:1:1
Glyma_18G258100_1&Glyma_16G115800_2	YN	3.28276	1.87986	1.74628	0.15847	858	181.97	676.03	626	125.347	500.653	2.98522	1.49468:1.49468:1:1:1:1
Glyma_18G258100_1&Glyma_19G241200_1	YN	2.51464	4.09167	0.614576	0.113777	1122	234.056	887.944	824	181.34	642.66	2.84362	0.963513:0.963513:1:1:1:1
Glyma_18G258100_1&Glyma_16G051300_1	YN	5.04196	2.25727	2.23366	3.7e-05	1098	267.015	830.985	816	172.736	643.264	4.36477	2:2:1:1:1:1
Glyma_18G258100_1&Glyma_19G099400_5	YN	2.15158	3.98235	0.540278	5.8e-09	1107	202.31	904.69	817	180.095	636.905	2.48616	0.42187:0.42187:1:1:1:1
Glyma_18G258100_1&Glyma_17G053300_1	YN	5.02566	1.62989	3.08343	7.43e-07	1098	284.883	813.117	808	177.467	630.533	4.1446	2.23877:2.23877:1:1:1:1
Glyma_09G239600_1&Glyma_13G295900_1	YN	5.22166	1.77733	2.93792	5.37e-07	1380	324.038	1055.96	1002	199.451	802.549	4.41289	1.87481:1.87481:1:1:1:1
Glyma_09G239600_1&Glyma_09G196400_1	YN	1.62988	3.04862	0.534627	0.834752	1308	299.066	1008.93	865	199.347	665.653	1.95426	1.50596:1.50596:1:1:1:1
Glyma_09G239600_1&Glyma_03G243700_1	YN	1.82564	3.98527	0.458097	6.17e-19	1203	203.1	999.9	878	193.82	684.18	2.19025	0.287586:0.287586:1:1:1:1
Glyma_09G239600_1&Glyma_13G118300_1	YN	4.78133	1.45625	3.28332	0.00435342	771	183.954	587.046	560	118.172	441.828	3.98799	1.7831:1.7831:1:1:1:1
Glyma_09G239600_1&|Glyma_09G065300_1	YN	2.19005	2.70047	0.810988	0.534259	1185	259.439	925.561	846	189.266	656.734	2.3018	0.905639:0.905639:1:1:1:1
Glyma_18G257900_1&Glyma_09G195400_1	YN	4.88811	1.60613	3.04342	7.75e-06	927	250.13	676.87	667	152.627	514.373	4.00254	4.11612:4.11612:1:1:1:1
Glyma_18G257900_1&Glyma_16G115700_1	YN	4.90022	1.3561	3.61347	5.72e-11	966	278.109	687.891	695	157.982	537.018	3.87988	4.52191:4.52191:1:1:1:1
Glyma_18G257900_1&Glyma_03G243700_1	YN	2.02343	4.16606	0.485693	7.24e-05	1317	258.463	1058.54	952	211.564	740.436	2.44392	0.737766:0.737766:1:1:1:1
Glyma_18G257900_1&Glyma_13G118300_1	YN	4.82798	1.52025	3.17579	0.00037942	837	212.277	624.723	604	132.664	471.336	3.98908	2.15023:2.15023:1:1:1:1
Glyma_18G257900_1&Glyma_13G106100_1	YN	5.05886	1.74831	2.89356	4.33e-06	1167	317.08	849.92	847	198.78	648.22	4.15936	3.04171:3.04171:1:1:1:1
Glyma_13G295900_1&Glyma_19G046000_1	YN	5.24802	1.14998	4.56356	8.02e-13	1437	359.547	1077.45	1003	195.69	807.31	4.22266	3.26299:3.26299:1:1:1:1
Glyma_13G295900_1&Glyma_13G046600_1	YN	5.1694	1.57632	3.2794	0.00112494	1290	305.102	984.898	943	200.855	742.145	4.31959	2.00467:2.00467:1:1:1:1
Glyma_13G295900_1&Glyma_11G088800_1	YN	4.47004	1.18456	3.77358	1.4e-05	525	137.369	387.631	378	78.8217	299.178	3.61038	2.88011:2.88011:1:1:1:1
Glyma_13G295900_1&Glyma_16G115800_2	YN	4.83118	1.132	4.26782	3.88e-13	873	245.603	627.397	631	133.688	497.312	3.79049	4.00619:4.00619:1:1:1:1
Glyma_13G295900_1&Glyma_16G051200_1	YN	3.01632	1.65334	1.82438	0.000233387	1191	295.745	895.255	837	182.537	654.463	2.67787	2.44594:2.44594:1:1:1:1
Glyma_19G046000_1&Glyma_09G196400_1	YN	3.12912	4.24354	0.737383	0.357065	1290	286.592	1003.41	960	219.047	740.953	3.3767	1.23382:1.23382:1:1:1:1
Glyma_19G046000_1&Glyma_16G051200_1	YN	2.26937	2.10621	1.07747	0.763427	1203	279.854	923.146	856	197.232	658.768	2.23141	1.57022:1.57022:1:1:1:1
Glyma_19G046000_1&|Glyma_09G065300_1	YN	2.25249	4.18005	0.538866	0.0186764	1209	263.328	945.672	881	206.941	674.059	2.67232	1.12182:1.12182:1:1:1:1
Glyma_13G046600_1&Glyma_09G196400_1	YN	1.78112	1.53368	1.16134	0.443402	1275	306.972	968.028	855	200.439	654.561	1.72154	1.77241:1.77241:1:1:1:1
Glyma_13G046600_1&Glyma_03G243700_1	YN	5.01211	1.49975	3.34197	0.000391896	1050	251.442	798.558	774	163.051	610.949	4.171	2:2:1:1:1:1
Glyma_13G046600_1&Glyma_13G118300_1	YN	4.76285	1.76884	2.69265	2.8e-06	753	180.241	572.759	553	107.643	445.357	4.04619	2:2:1:1:1:1
Glyma_13G046600_1&|Glyma_09G065300_1	YN	2.66102	1.75854	1.5132	0.000375411	1125	294.607	830.393	786	181.13	604.87	2.42468	2.12043:2.12043:1:1:1:1
Glyma_07G000300_1&Glyma_09G195400_1	YN	4.90409	1.49669	3.27663	0.00101449	948	256.552	691.448	689	166.258	522.742	3.98197	3.16026:3.16026:1:1:1:1
Glyma_07G000300_1&Glyma_16G115700_1	YN	2.97265	1.3048	2.27824	4.75e-06	1023	269.38	753.62	712	157.522	554.478	2.53346	2.24746:2.24746:1:1:1:1
Glyma_07G000300_1&Glyma_03G243700_1	YN	3.92554	1.93453	2.0292	0.0784866	1200	287.536	912.464	880	199.301	680.699	3.44847	1.52696:1.52696:1:1:1:1
Glyma_07G000300_1&Glyma_13G118300_1	YN	1.88204	99	0.0190105	2.41e-25	828	138.584	689.416	616	140.984	475.016	18.1368	0.00362199:0.00362199:1:1:1:1
Glyma_07G000300_1&Glyma_13G106100_1	YN	2.32263	4.08791	0.568169	9.89e-05	1113	232.887	880.113	784	187.877	596.123	2.692	0.52692:0.52692:1:1:1:1
Glyma_09G196400_1&Glyma_11G088800_1	YN	2.14629	1.93943	1.10666	0.819119	510	119.859	390.141	359	83.1229	275.877	2.09767	1.19785:1.19785:1:1:1:1
Glyma_09G196400_1&Glyma_16G115800_2	YN	4.84065	1.8358	2.6368	0.0034787	843	207.637	635.363	643	142.259	500.741	4.10053	1.69867:1.69867:1:1:1:1
Glyma_09G196400_1&Glyma_16G051200_1	YN	4.98687	1.77499	2.80951	0.00209605	1032	259.866	772.134	775	176.619	598.381	4.17809	2:2:1:1:1:1
Glyma_01G156000_1&Glyma_09G195400_1	YN	5.00193	1.08936	4.59163	8.15e-16	1092	304.203	787.797	790	165.643	624.357	3.91199	3.89777:3.89777:1:1:1:1
Glyma_01G156000_1&Glyma_16G115700_1	YN	2.89077	2.54819	1.13444	0.00637775	1173	280.997	892.003	837	182.172	654.828	2.8087	1.46182:1.46182:1:1:1:1
Glyma_01G156000_1&Glyma_03G243700_1	YN	3.02147	1.24584	2.42525	6.79e-09	1284	344.389	939.611	879	192.094	686.906	2.54522	2.6067:2.6067:1:1:1:1
Glyma_01G156000_1&Glyma_13G118300_1	YN	1.80025	3.77119	0.477369	0.00147427	789	152.667	636.333	557	123.031	433.969	2.18162	0.586489:0.586489:1:1:1:1
Glyma_01G156000_1&Glyma_13G106100_1	YN	4.93979	2.80905	1.75852	2.11e-05	975	249.847	725.153	730	161.818	568.182	4.39378	1.97646:1.97646:1:1:1:1
Glyma_11G088800_1&Glyma_03G243700_1	YN	3.18709	2.48239	1.28388	0.669406	612	146.768	465.232	450	106.056	343.944	3.01809	2:2:1:1:1:1
Glyma_11G088800_1&Glyma_13G118300_1	YN	2.82213	1.63584	1.72519	0.205591	408	102.499	305.501	292	68.1939	223.806	2.52411	2:2:1:1:1:1
Glyma_11G088800_1&|Glyma_09G065300_1	YN	4.55693	2.63454	1.72969	0.574058	573	137.755	435.245	428	100.236	327.764	4.09477	1.58951:1.58951:1:1:1:1
Glyma_09G195400_1&Glyma_16G115700_1	YN	2.84607	1.16268	2.44786	1.96e-07	1182	294.418	887.582	818	167.284	650.716	2.42676	1.87912:1.87912:1:1:1:1
Glyma_09G195400_1&Glyma_19G241200_1	YN	2.08825	4.14853	0.50337	9.4e-06	1188	252.491	935.509	870	211.709	658.291	2.52613	0.599485:0.599485:1:1:1:1
Glyma_09G195400_1&Glyma_16G051300_1	YN	5.01928	1.65674	3.02961	0.000302605	1086	279.763	806.237	814	186.782	627.218	4.15306	2.05012:2.05012:1:1:1:1
Glyma_09G195400_1&Glyma_19G099400_5	YN	2.74082	4.08188	0.67146	0.148563	1053	231.02	821.98	780	179.467	600.533	3.03504	0.963872:0.963872:1:1:1:1
Glyma_09G195400_1&Glyma_13G106100_1	YN	3.51757	2.39306	1.46991	0.000239629	873	239.233	633.767	618	147.041	470.959	3.20942	2.78415:2.78415:1:1:1:1
Glyma_09G195400_1&Glyma_17G053300_1	YN	2.57877	1.50602	1.71231	0.0447887	882	231.041	650.959	619	150.017	468.983	2.29776	2.1404:2.1404:1:1:1:1
Glyma_16G115700_1&Glyma_19G241200_1	YN	5.06584	2.18014	2.32363	0.0192311	1161	303.135	857.865	881	214.927	666.073	4.31238	2:2:1:1:1:1
Glyma_16G115700_1&Glyma_16G051300_1	YN	2.70271	2.57142	1.05106	0.872098	1065	256.972	808.028	776	186.478	589.522	2.67103	1.21326:1.21326:1:1:1:1
Glyma_16G115700_1&Glyma_19G099400_5	YN	2.42742	4.11125	0.590433	0.186006	1059	240.247	818.753	773	183.067	589.933	2.80941	0.851923:0.851923:1:1:1:1
Glyma_16G115700_1&Glyma_13G106100_1	YN	1.71808	4.00862	0.428597	0.000660945	939	209.522	729.478	649	164.277	484.723	2.22918	0.956447:0.956447:1:1:1:1
Glyma_16G115700_1&Glyma_17G053300_1	YN	1.8827	4.00219	0.470416	0.00197265	954	207.733	746.267	669	163.808	505.192	2.34422	0.856806:0.856806:1:1:1:1
Glyma_16G115800_2&Glyma_03G243700_1	YN	2.29393	1.43806	1.59515	0.0325859	999	227.516	771.484	697	145.555	551.445	2.09901	1.6795:1.6795:1:1:1:1
Glyma_16G115800_2&Glyma_13G118300_1	YN	4.62725	2.12678	2.17571	0.157966	627	148.97	478.03	471	105.172	365.828	4.03316	2:2:1:1:1:1
Glyma_16G115800_2&|Glyma_09G065300_1	YN	4.82914	2.4939	1.93638	9.25e-05	834	208.31	625.69	613	131.074	481.926	4.24586	2:2:1:1:1:1
Glyma_03G243700_1&Glyma_19G241200_1	YN	0.167502	0.138677	1.20786	0.14645	2142	587.026	1554.97	307	73.7306	233.269	0.159603	2.70809:2.70809:1:1:1:1
Glyma_03G243700_1&Glyma_16G051300_1	YN	5.39807	1.80756	2.98639	7.13e-09	1845	509.011	1335.99	1317	312.122	1004.88	4.4075	3.31543:3.31543:1:1:1:1
Glyma_03G243700_1&Glyma_19G099400_5	YN	2.4905	1.55274	1.60394	0.006855	1908	488.595	1419.4	1344	320.221	1023.78	2.25036	2.09268:2.09268:1:1:1:1
Glyma_03G243700_1&Glyma_17G053300_1	YN	5.13859	1.43759	3.57446	2.28e-14	1272	326.749	945.251	949	190.953	758.047	4.18788	2:2:1:1:1:1
Glyma_19G241200_1&Glyma_13G118300_1	YN	2.01301	2.91257	0.691145	0.190601	873	202.325	670.675	608	148.621	459.379	2.22149	1.16665:1.16665:1:1:1:1
Glyma_19G241200_1&Glyma_13G106100_1	YN	5.12294	1.94949	2.62783	0.0369769	1212	286.268	925.732	898	198.744	699.256	4.37339	1.35283:1.35283:1:1:1:1
Glyma_16G051300_1&Glyma_13G118300_1	YN	3.08523	2.40336	1.28372	0.531029	849	192.541	656.459	596	138.546	457.454	2.93059	0.889107:0.889107:1:1:1:1
Glyma_16G051300_1&Glyma_13G106100_1	YN	4.12859	1.57477	2.62172	9.19e-06	1173	318.624	854.376	834	195.824	638.176	3.43489	2.91447:2.91447:1:1:1:1
Glyma_16G051200_1&|Glyma_09G065300_1	YN	5.09269	1.21179	4.20264	9.56e-13	1236	346.859	889.141	892	198.557	693.443	4.00359	4.77978:4.77978:1:1:1:1
Glyma_19G099400_5&Glyma_13G118300_1	YN	2.16324	2.02781	1.06678	0.790474	861	199.756	661.244	608	139.786	468.214	2.13182	1.12099:1.12099:1:1:1:1
Glyma_19G099400_5&Glyma_13G106100_1	YN	2.69414	3.01118	0.894711	0.00826134	1185	302.329	882.671	840	196.227	643.773	2.77503	2.11841:2.11841:1:1:1:1
Glyma_13G118300_1&Glyma_17G053300_1	YN	4.80527	2.09257	2.29634	0.000107832	825	218.912	606.088	610	139.896	470.104	4.08546	2:2:1:1:1:1
Glyma_13G106100_1&Glyma_17G053300_1	YN	0.165819	0.159182	1.04169	0.751038	1674	422.302	1251.7	246	59.8828	186.117	0.164144	1.83653:1.83653:1:1:1:1
