# Supplementary material for: Genome-wide identification and expression analysis of diacylglycerol acyltransferase genes in soybean ( Glycine max )
Source: PeerJ journal article supplement (doi:10.7717/peerj.14941), 2023-03-20
Supplement: qpcr-3.xlsx [file qpcr-3.xlsx]

## Sheet: Sheet1
Sample Name	DGAT1A	Std	average value	Coefficient of variation	Actin	Std	average value	CV	ΔCt	ΔΔCt	2-ΔΔCt	Mean	Std
10d	28.7674	0.124578	28.7171	0.0043381	23.0583	0.026554	23.0317	0.00115293	5.70914	-0.358151	1.28178	1.3054	0.0964694
10d	28.5752				23.0052				5.57008	-0.497209	1.41148
10d	28.8087				23.0317				5.77695	-0.290339	1.22293
20d	28.3633	0.172126	28.3842	0.00606417	22.5552	0.258956	22.324	0.0115999	5.80808	-0.259209	1.19682	1.01285	0.159385
20d	28.5658				22.3726				6.1932	0.125908	0.916427
20d	28.2234				22.0442				6.17929	0.111997	0.925307
30d	27.8279	0.0667724	27.8947	0.00239373	21.5183	0.138311	21.4384	0.00645155	6.30966	0.242375	0.845353	0.768395	0.101992
30d	27.8947				21.5183				6.37644	0.309147	0.807119
30d	27.9615				21.2787				6.68277	0.615481	0.652712
40d	25.4745	0.0548462	25.4197	0.00215763	20.0599	0.0101415	20.0493	0.000505825	5.41464	-0.652646	1.57205	1.62172	0.0563002
40d	25.4197				20.0396				5.38002	-0.687264	1.61023
40d	25.3648				20.0485				5.31636	-0.750929	1.68288
50d	28.1611	0.0644718	28.1674	0.00228888	24.4068	0.128161	24.4757	0.00523625	3.75436	-2.31293	4.9689	5.21869	0.689574
50d	28.1063				24.6235				3.48272	-2.58457	5.99835
50d	28.2347				24.3967				3.83806	-2.22923	4.68883
60d	26.618	0.0320981	26.593	0.00120701	23.182	0.0889789	23.2548	0.00382626	3.43598	-2.63131	6.19588	6.63928	0.426486
60d	26.6043				23.354				3.25037	-2.81692	7.04656
60d	26.5568				23.2284				3.32843	-2.73886	6.67541
root	27.5999	0.284459	27.5285	0.0103332	22.5985	0.19152	22.4069	0.00854735	5.00146	-1.06582	2.09337	1.97098	0.495049
root	27.7705				22.2154				5.5551	-0.512191	1.42621
root	27.2152				22.4069				4.80825	-1.25903	2.39335
steam	30.8219	0.114549	30.9119	0.00370568	22.7237	0.117767	22.6802	0.00519248	8.09815	2.03086	0.24471	0.224871	0.0336683
steam	30.8729				22.77				8.10289	2.0356	0.243906
steam	31.0408				22.5469				8.49394	2.42665	0.185997
leaf	29.1078	0.0835485	29.1837	0.00286284	21.1544	0.185648	21.3401	0.00869951	7.95336	1.88607	0.270543	0.292413	0.0208368
leaf	29.2732				21.5257				7.74751	1.68022	0.312034
leaf	29.1702				21.3401				7.83016	1.76287	0.294661
flower	31.0114	0.0576343	31.078	0.00185451	23.9197	0.40722	23.5896	0.0172627	7.09172	1.02443	0.491604	0.385224	0.113177
flower	31.1118				23.7145				7.39727	1.32998	0.397773
flower	31.1107				23.1345				7.97619	1.9089	0.266296
Sample Name	DGAT1B	Std	average value	CV	Actin	Std	average value	CV	ΔCt	ΔΔCt	2-ΔΔCt	Mean	Std
10d	25.1347	0.0461066	25.1289	0.0018348	23.108	0.161271	22.9302	0.00703311	2.0267	-4.04059	16.4565	14.6603	1.55569
10d	25.0801				22.7933				2.28684	-3.78045	13.7413
10d	25.1718				22.8894				2.28245	-3.78484	13.7832
20d	25.1288	0.0415332	25.1498	0.00165143	21.9867	0.231204	22.2463	0.0103929	3.14214	-2.92515	7.59554	9.02201	1.24029
20d	25.123				22.3225				2.80053	-3.26676	9.6248
20d	25.1977				22.4299				2.7678	-3.29949	9.8457
30d	25.0291	0.0203831	25.0389	0.000814057	21.0203	0.453767	20.5791	0.0220499	4.00886	-2.05843	4.16532	3.155	0.997197
30d	25.0252				20.6033				4.42195	-1.64534	3.12822
30d	25.0623				20.1137				4.94862	-1.11867	2.17147
40d	23.4981	0.171232	23.3136	0.00734473	19.4999	0.165405	19.3976	0.00852708	3.99816	-2.06913	4.19634	4.47555	0.683717
40d	23.1598				19.4861				3.67368	-2.39361	5.25469
40d	23.2829				19.2068				4.07611	-1.99118	3.97563
50d	24.9323	0.053647	24.9912	0.00214664	23.8109	0.0386297	23.7689	0.00162522	1.12149	-4.94579	30.82	28.7764	1.77128
50d	25.0374				23.761				1.2764	-4.79089	27.6823
50d	25.0037				23.7348				1.26888	-4.79841	27.8269
60d	24.2942	0.130683	24.2688	0.00538481	23.1142	0.0696795	23.0957	0.00301699	1.18009	-4.8872	29.5934	29.7547	1.26831
60d	24.3849				23.1543				1.23062	-4.83667	28.5747
60d	24.1273				23.0186				1.10863	-4.95865	31.0959
root	24.2027	0.0123906	24.2168	0.000511652	22.7201	0.0609158	22.6711	0.00268693	1.4826	-4.58469	23.9954	22.9858	1.0915
root	24.2221				22.6029				1.6192	-4.44809	21.8277
root	24.2257				22.6904				1.53532	-4.53197	23.1344
steam	26.2663	0.109613	26.1494	0.00419182	22.8976	0.244327	22.7182	0.0107547	3.36862	-2.69867	6.49204	6.27148	0.994889
steam	26.1329				22.4399				3.69299	-2.37429	5.18482
steam	26.0489				22.817				3.23185	-2.83544	7.13758
leaf	24.1723	0.0472083	24.1245	0.00195686	21.5863	0.028384	21.5799	0.0013153	2.58598	-3.48131	11.1681	11.5005	0.499549
leaf	24.0779				21.6046				2.47334	-3.59394	12.0749
leaf	24.1233				21.5489				2.57436	-3.49292	11.2584
flower	24.6567	0.068354	24.5849	0.00278033	23.646	0.119329	23.5228	0.00507293	1.01066	-5.05663	33.281	32.1599	2.03285
flower	24.5206				23.5145				1.00614	-5.06114	33.3854
flower	24.5772				23.4078				1.1694	-4.89789	29.8134
Sample Name	DGAT1C	Std	average value	CV	Actin	Std	average value	CV	ΔCt	ΔΔCt	2-ΔΔCt	Mean	Std
10d	21.1215	0.0280325	21.1519	0.00132529	21.6076	0.0601313	21.609	0.00278269	-0.486059	-6.55335	93.9192	92.1345	4.6728
10d	21.1574				21.6699				-0.512434	-6.57972	95.652
10d	21.1768				21.5496				-0.372873	-6.44016	86.8324
20d	22.6199	0.0847336	22.5367	0.0037598	22.3236	0.121815	22.3312	0.00545493	0.296246	-5.77104	54.6081	58.4775	7.69802
20d	22.5397				22.2134				0.326312	-5.74098	53.4818
20d	22.4505				22.4567				-0.00615856	-6.07345	67.3426
30d	23.036	0.0613957	22.9899	0.00267056	23.2031	0.0119775	23.2063	0.000516129	-0.167138	-6.23443	75.2921	77.9497	2.99928
30d	23.0135				23.2196				-0.206141	-6.27343	77.3554
30d	22.9202				23.1963				-0.276149	-6.34344	81.2017
40d	25.2008	0.0235751	25.1861	0.000936038	23.7271	0.0585754	23.7904	0.00246215	1.47366	-4.59363	24.1445	25.5036	1.17705
40d	25.1589				23.8013				1.3576	-4.70968	26.1671
40d	25.1986				23.8427				1.35585	-4.71144	26.199
50d	24.2157	0.0497966	24.2513	0.00205335	24.2625	0.0636243	24.3191	0.00261623	-0.0468219	-6.11411	69.2677	70.3541	4.02446
50d	24.3082				24.3067				0.00153413	-6.06575	66.9845
50d	24.2301				24.3879				-0.157876	-6.22517	74.8103
60d	24.3853	0.199798	24.4532	0.00817066	23.4124	0.12	23.5324	0.00509936	0.972884	-5.0944	34.164	35.5311	3.48539
60d	24.2961				23.5324				0.763771	-5.30352	39.4928
60d	24.678				23.6524				1.02567	-5.04161	32.9365
root	24.3853	0.199798	24.4532	0.00817066	24.6351	0.160108	24.7722	0.0064632	-0.249874	-6.31716	79.7362	83.7968	6.08276
root	24.2961				24.7333				-0.437178	-6.50447	90.7903
root	24.678				24.9482				-0.270136	-6.33742	80.8639
steam	25.1359	0.0184265	25.1194	0.000733557	25.7724	0.0501362	25.7767	0.00194502	-0.636551	-6.70384	104.245	105.828	4.75264
steam	25.0995				25.8288				-0.72934	-6.79663	111.17
steam	25.1227				25.7288				-0.606113	-6.6734	102.069
leaf	24.1723	0.0472083	24.1245	0.00195686	23.7127	0.225534	23.5217	0.00958834	0.459622	-5.60767	48.7614	44.4721	6.339
leaf	24.0779				23.5794				0.498525	-5.56876	47.4641
leaf	24.1233				23.2729				0.850412	-5.21688	37.1909
flower	24.8179	0.0854017	24.9118	0.00342817	23.8197	0.0539863	23.7601	0.00227214	0.998168	-5.06912	33.5705	30.2693	2.86624
flower	24.9326				23.7145				1.21812	-4.84916	28.8233
flower	24.9848				23.746				1.23876	-4.82853	28.414
Sample Name	cytoDGAT	Std	average value	CV	Actin	Std	average value	CV	ΔCt	ΔΔCt	2-ΔΔCt	Mean	Std
10d	26.2355	0.0867137	26.2438	0.00330416	22.3852	0.0561325	22.4025	0.00250564	3.85029	-2.217	4.64926	4.69318	0.45943
10d	26.3343				22.357				3.97735	-2.08994	4.25729
10d	26.1615				22.4652				3.69629	-2.371	5.173
20d	26.3672	0.121518	26.2295	0.00463287	21.9395	0.247939	21.6566	0.0114487	4.42769	-1.6396	3.11579	2.82476	0.253496
20d	26.1371				21.477				4.66013	-1.40716	2.65214
20d	26.1843				21.5533				4.63094	-1.43635	2.70634
30d	23.9563	0.0356337	23.9974	0.0014849	20.9869	0.0950291	20.9319	0.00453992	2.96934	-3.09795	8.562	8.02704	0.634975
30d	24.0165				20.8221				3.1944	-2.87289	7.32533
30d	24.0193				20.9866				3.03276	-3.03453	8.19379
40d	23.0894	0.0469567	23.1289	0.00203022	19.2227	0.187697	19.3216	0.00971433	3.86668	-2.20061	4.59674	4.80632	0.492343
40d	23.1808				19.5381				3.6427	-2.42459	5.36877
40d	23.1165				19.2041				3.91237	-2.15492	4.45344
50d	26.4072	0.0775305	26.4942	0.00292632	22.8765	0.222063	22.8022	0.00973868	3.53072	-2.53656	5.80206	5.23468	0.824541
50d	26.5192				22.5525				3.9667	-2.10059	4.28885
50d	26.5561				22.9776				3.57848	-2.4888	5.61313
60d	25.8994	0.0304984	25.9103	0.00117708	21.5916	0.251594	21.3013	0.0118112	4.3078	-1.75949	3.38578	2.77945	0.529253
60d	25.9448				21.1466				4.79822	-1.26907	2.41006
60d	25.8868				21.1658				4.72103	-1.34626	2.54252
root	25.6287	0.043042	25.579	0.00168271	21.2283	0.154383	21.2811	0.00725447	4.40043	-1.66686	3.17523	3.42578	0.424255
root	25.553				21.4549				4.09805	-1.96924	3.91562
root	25.5554				21.16				4.39532	-1.67197	3.18649
steam	26.7769	0.335166	26.4821	0.0126563	21.6355	0.0484421	21.6877	0.00223362	5.14143	-0.925858	1.89981	2.46746	0.620417
steam	26.5519				21.7312				4.8207	-1.24659	2.37279
steam	26.1176				21.6963				4.42123	-1.64606	3.12977
leaf	23.1606	0.0403835	23.1304	0.00174591	20.0747	0.0417974	20.1029	0.00207917	3.08589	-2.9814	7.8975	8.23286	0.475359
leaf	23.146				20.0831				3.06293	-3.00436	8.02422
leaf	23.0845				20.1509				2.93358	-3.1337	8.77686
flower	26.0902	0.0221047	26.1156	0.000846418	22.0845	0.144901	22.1083	0.00655417	4.00573	-2.06156	4.17436	4.18303	0.408657
flower	26.1305				22.2636				3.86693	-2.20036	4.59595
flower	26.1261				21.9767				4.14937	-1.91792	3.77877
Sample Name	DGAT2a1	Std	average value	CV	Actin	Std	average value	CV	ΔCt	ΔΔCt	2-ΔΔCt	Mean	Std
10d	29.2674	0.147483	29.1404	0.00506113	24.1689	0.12821	24.0256	0.0053364	5.09852	-0.968771	1.95717	1.94045	0.174868
10d	29.1752				23.9217				5.2535	-0.813792	1.75783
10d	28.9787				23.9861				4.99254	-1.07475	2.10636
20d	28.3633	0.172126	28.3842	0.00606417	22.9365	0.185232	23.1107	0.008015	5.42672	-0.640573	1.55895	1.73962	0.176015
20d	28.5658				23.3053				5.26049	-0.806803	1.74933
20d	28.2234				23.0902				5.13328	-0.934008	1.91058
30d	28.8279	0.0408647	28.7834	0.00141973	23.0139	0.322955	22.8161	0.0141547	5.81405	-0.253237	1.19188	1.08586	0.205908
30d	28.7747				22.9909				5.78378	-0.283511	1.21715
30d	28.7476				22.4434				6.30422	0.236935	0.848546
40d	28.0745	0.07657	28.133	0.00272172	22.4188	0.0740023	22.424	0.00330014	5.65574	-0.411549	1.33011	1.2858	0.120928
40d	28.2197				22.3527				5.86695	-0.20034	1.14897
40d	28.1048				22.5005				5.60437	-0.462915	1.37832
50d	29.1611	0.0355546	29.1203	0.00122095	22.9196	0.0952686	23.0095	0.00414041	6.24154	0.174253	0.886226	0.972801	0.0855508
50d	29.0963				23.1093				5.98692	-0.0803711	1.05729
50d	29.1035				22.9995				6.10398	0.0366957	0.974885
60d	28.618	0.00406522	28.6183	0.00014205	22.5584	0.33452	22.4639	0.0148914	6.05954	-0.00774848	1.00539	0.957522	0.208102
60d	28.6143				22.0923				6.522	0.454708	0.729658
60d	28.6225				22.7411				5.88139	-0.185895	1.13752
root	27.5999	0.0992598	27.5285	0.0036057	21.5613	0.0479846	21.5593	0.0022257	6.03861	-0.0286742	1.02007	1.07371	0.10627
root	27.5705				21.5104				6.06017	-0.00711842	1.00495
root	27.4152				21.6063				5.80894	-0.258348	1.19611
steam	30.8219	0.114549	30.9119	0.00370568	22.1044	0.631696	22.5769	0.0279797	8.71752	2.65023	0.159295	0.217201	0.082984
steam	30.8729				22.332				8.54093	2.47364	0.180036
steam	31.0408				23.2944				7.74642	1.67913	0.312271
leaf	29.1078	0.0577891	29.1671	0.00198131	22.9239	0.0436915	22.9071	0.00190734	6.18384	0.116549	0.922392	0.875601	0.0414391
leaf	29.2232				22.9398				6.28341	0.216123	0.860876
leaf	29.1702				22.8575				6.31277	0.24548	0.843535
flower	28.4114	0.0761073	28.4946	0.00267093	23.7552	0.0206599	23.7787	0.000868843	4.65624	-1.41105	2.65931	2.55288	0.104232
flower	28.5118				23.794				4.71773	-1.34956	2.54834
flower	28.5607				23.7868				4.77392	-1.29337	2.451
Sample Name	DGAT2b1	Std	average value	CV	Actin	Std	average value	CV	ΔCt	ΔΔCt	2-ΔΔCt	Mean	Std
10d	26.8674	0.021912	26.8838	0.000815065	22.5008	0.0663836	22.575	0.00294059	4.36664	-1.70065	3.25047	3.38537	0.141556
10d	26.8752				22.6287				4.2465	-1.82079	3.53275
10d	26.9087				22.5954				4.31331	-1.75398	3.37288
20d	27.7633	0.0515219	27.8175	0.00185214	22.7421	0.135596	22.8637	0.00593061	5.02113	-1.04616	2.06503	2.16636	0.132054
20d	27.8658				23.0099				4.85584	-1.21145	2.3157
20d	27.8234				22.8391				4.98436	-1.08293	2.11834
30d	27.8279	0.0667724	27.8947	0.00239373	21.8513	0.156927	21.8024	0.0071977	5.97662	-0.0906703	1.06486	0.989543	0.137515
30d	27.8947				21.929				5.96572	-0.101571	1.07294
30d	27.9615				21.6268				6.33468	0.267389	0.830822
40d	29.7245	0.0247893	29.7363	0.000833638	23.6517	0.149318	23.6151	0.00632298	6.07286	0.00557173	0.996145	0.965882	0.0852199
40d	29.7197				23.4509				6.26876	0.201476	0.869661
40d	29.7648				23.7428				6.02207	-0.045219	1.03184
50d	29.4611	0.0755181	29.5216	0.00255806	23.1976	0.150636	23.0466	0.00653618	6.26357	0.196286	0.872795	0.759816	0.116266
50d	29.6063				22.8963				6.70997	0.642683	0.640521
50d	29.4975				23.0458				6.45162	0.384336	0.766132
60d	28.218	0.056866	28.1597	0.00201941	20.9308	0.217219	21.1738	0.0102589	7.28712	1.21983	0.429333	0.534668	0.0919183
60d	28.1043				21.2413				6.86301	0.795723	0.576055
60d	28.1568				21.3492				6.80758	0.740293	0.598618
root	28.9993	0.108524	29.0697	0.00373324	22.0514	0.209078	22.2895	0.0093801	6.94792	0.880635	0.543128	0.612419	0.0649466
root	29.1947				22.4429				6.75179	0.684505	0.622219
root	29.0152				22.3742				6.64095	0.573665	0.671908
steam	30.1022	0.0656868	30.0297	0.00218739	22.8411	0.377922	22.7436	0.0166166	7.26111	1.19382	0.437144	0.438	0.104026
steam	30.0129				23.0632				6.94972	0.882433	0.542452
steam	29.9741				22.3265				7.64762	1.58033	0.334405
leaf	26.1078	0.0835485	26.1837	0.00319086	23.6407	0.101909	23.7475	0.00429138	2.46703	-3.60026	12.1279	12.4084	0.855623
leaf	26.2732				23.7579				2.51537	-3.55192	11.7283
leaf	26.1702				23.8438				2.32646	-3.74083	13.3691
flower	28.3114	0.0852869	28.4011	0.00300294	24.9469	0.229599	24.7752	0.00926731	3.3645	-2.70278	6.51057	5.49309	1.00394
flower	28.4812				24.8642				3.61695	-2.45034	5.46544
flower	28.4107				24.5144				3.89632	-2.17097	4.50326
Sample Name	WS/DGATa6	Std	average value	CV	Actin	Std	average value	CV	ΔCt	ΔΔCt	2-ΔΔCt	Mean	Std
10d	28.7674	0.124578	28.7171	0.0043381	23.8498	0.0607951	23.785	0.00255602	4.91764	-1.14965	2.2186	2.20346	0.213163
10d	28.5752				23.7762				4.79907	-1.26822	2.40864
10d	28.8087				23.7291				5.07951	-0.987775	1.98312
20d	28.7633	0.069922	28.6942	0.0024368	22.3413	0.393426	21.8872	0.0179752	6.42191	0.354625	0.782073	0.610124	0.149207
20d	28.6958				21.6705				7.02529	0.957998	0.514771
20d	28.6234				21.6498				6.97365	0.906361	0.533529
30d	31.4279	0.0667724	31.4947	0.00212011	23.2092	0.277247	23.4763	0.0118097	8.21871	2.15142	0.225091	0.261371	0.0477035
30d	31.4947				23.7627				7.73201	1.66472	0.315406
30d	31.5615				23.4569				8.1046	2.03731	0.243617
40d	31.1045	0.0476327	31.0597	0.00153359	22.3943	0.477012	21.9368	0.0217448	8.71025	2.64297	0.160099	0.123813	0.0358629
40d	31.0097				21.4424				9.56729	3.5	0.0883885
40d	31.0648				21.9737				9.09112	3.02383	0.122953
50d	28.1611	0.0644718	28.1674	0.00228888	21.9362	0.357606	21.5572	0.0165887	6.2249	0.157611	0.896509	0.6998	0.173392
50d	28.1063				21.2258				6.88045	0.813159	0.569134
50d	28.2347				21.5095				6.72529	0.658	0.633756
60d	31.618	0.0320981	31.593	0.00101598	21.6181	0.496603	21.9588	0.0226152	9.99984	3.93255	0.0654912	0.0884515	0.034752
60d	31.6043				21.7297				9.87461	3.80732	0.0714304
60d	31.5568				22.5286				9.0282	2.96091	0.128433
root	27.1999	0.114018	27.1419	0.00420082	22.1496	0.352364	21.7861	0.0161738	5.05029	-1.01699	2.0237	1.65732	0.322395
root	27.0105				21.4461				5.56444	-0.502849	1.41701
root	27.2152				21.7626				5.45258	-0.614706	1.53125
steam	21.8219	0.0596676	21.8785	0.00272722	21.2354	0.0229977	21.2451	0.0010825	0.586532	-5.48076	44.6552	43.2383	1.2816
steam	21.8729				21.2285				0.644388	-5.4229	42.8999
steam	21.9408				21.2713				0.669487	-5.3978	42.16
leaf	23.0908	0.109753	22.9647	0.0047792	22.1367	0.0225891	22.1597	0.00101938	0.954091	-5.1132	34.6119	38.4829	3.4092
leaf	22.9132				22.1606				0.752649	-5.31464	39.7984
leaf	22.8902				22.1818				0.708388	-5.3589	41.0384
flower	25.2114	0.0578406	25.1446	0.00230032	23.0273	0.112153	23.1548	0.00484362	2.18416	-3.88313	14.7549	16.9589	1.92476
flower	25.1118				23.1993				1.91248	-4.15481	17.8124
flower	25.1107				23.2379				1.87279	-4.1945	18.3093
Sample Name	WS/DGATb2	Std	average value	CV	Actin	Std	average value	CV	ΔCt	ΔΔCt	2-ΔΔCt	Mean	Std
10d	27.6674	0.0844846	27.6838	0.00305178	23.1982	0.0731566	23.1447	0.00316083	4.46923	-1.59805	3.02735	2.89493	0.296623
10d	27.7752				23.0614				4.71387	-1.35342	2.55517
10d	27.6087				23.1747				4.43396	-1.63333	3.10229
20d	27.0633	0.0734381	27.0842	0.00271148	21.2557	0.255212	21.4651	0.0118896	5.80761	-0.25968	1.19721	1.37282	0.187392
20d	27.1658				21.7494				5.41642	-0.650866	1.57011
20d	27.0234				21.3903				5.63311	-0.434175	1.35114
30d	29.2279	0.0332276	29.1947	0.00113814	23.1542	0.182851	23.1366	0.0079031	6.07377	0.00648182	0.995517	1.01087	0.117163
30d	29.1947				23.3101				5.88465	-0.182635	1.13496
30d	29.1615				22.9456				6.21586	0.148573	0.902142
40d	27.5745	0.0796331	27.4863	0.00289719	21.6272	0.142162	21.7191	0.00654548	5.94728	-0.120011	1.08674	1.23779	0.156866
40d	27.4197				21.6472				5.77246	-0.294832	1.22674
40d	27.4648				21.8829				5.58197	-0.485314	1.39989
50d	27.8611	0.0371201	27.9007	0.00133043	22.4912	0.126997	22.3518	0.00568174	5.36988	-0.697406	1.62159	1.43856	0.166168
50d	27.9063				22.3212				5.58505	-0.482236	1.39691
50d	27.9347				22.2428				5.69192	-0.375372	1.29717
60d	27.9999	0.0777686	27.9952	0.00277792	22.829	0.196874	22.7637	0.00864857	5.17092	-0.896365	1.86137	1.7891	0.148363
60d	28.0705				22.9197				5.15082	-0.916467	1.88749
60d	27.9152				22.5425				5.37267	-0.694616	1.61845
root	29.218	0.278597	29.2597	0.00952151	21.3087	0.388685	21.7573	0.0178646	7.9093	1.84201	0.278932	0.38251	0.123858
root	29.0043				21.9928				7.01152	0.944229	0.519707
root	29.5568				21.9704				7.58644	1.51915	0.348891
steam	25.9219	0.0795691	26.0119	0.00305895	22.6988	0.0975528	22.6059	0.00431536	3.22306	-2.84423	7.18122	6.35707	0.771656
steam	26.0729				22.5043				3.56861	-2.49868	5.65168
steam	26.0408				22.6147				3.42613	-2.64116	6.23832
leaf	24.6078	0.0272594	24.6027	0.00110799	23.9876	0.121837	23.8745	0.00510321	0.620133	-5.44716	43.6272	40.5987	3.75445
leaf	24.5732				23.8904				0.682859	-5.38443	41.771
leaf	24.627				23.7455				0.881501	-5.18579	36.398
flower	22.8487	0.205275	22.7072	0.0090401	22.1763	0.199565	22.2347	0.00897538	0.672495	-5.39479	42.0722	48.5618	5.71186
flower	22.4718				22.0709				0.400892	-5.6664	50.7873
flower	22.8011				22.457				0.344116	-5.72317	52.8259
Sample Name	WS/DGATc1	Std	average value	CV	Actin	Std	average value	CV	ΔCt	ΔΔCt	2-ΔΔCt	Mean	Std
10d	31.3974	0.0663413	31.4412	0.00211001	22.2056	0.0523675	22.1504	0.00236418	9.19182	3.12453	0.114663	0.107203	0.00688184
10d	31.5175				22.1441				9.37341	3.30612	0.101101
10d	31.4087				22.1014				9.30725	3.23996	0.105846
20d	29.9633	0.0716964	29.8842	0.00239914	21.2087	0.0958567	21.2028	0.00452094	8.75455	2.68726	0.155258	0.16359	0.0112728
20d	29.8658				21.2956				8.57023	2.50294	0.176417
20d	29.8234				21.1041				8.71933	2.65204	0.159095
30d	31.5279	0.0332276	31.4947	0.00105502	22.6504	0.172731	22.464	0.00768926	8.87755	2.81026	0.14257	0.128616	0.0126617
30d	31.4947				22.4323				9.06245	2.99516	0.12542
30d	31.4615				22.3093				9.15216	3.08487	0.117859
40d	31.1745	0.0292715	31.153	0.000939603	22.2491	0.13452	22.171	0.0060674	8.92544	2.85815	0.137915	0.132842	0.00952403
40d	31.1197				22.0156				9.10405	3.03676	0.121855
40d	31.1648				22.2482				8.91667	2.84938	0.138756
50d	31.1611	0.0633743	31.1007	0.00203771	21.5289	0.16535	21.7196	0.00761294	9.6322	3.56491	0.0844996	0.101337	0.0149782
50d	31.1063				21.8056				9.30066	3.23337	0.10633
50d	31.0347				21.8242				9.2106	3.14331	0.11318
60d	32.618	0.0520845	32.6117	0.00159711	22.8286	0.226297	22.9324	0.009868	9.78939	3.7221	0.0757767	0.0828201	0.0165297
60d	32.6604				22.7767				9.88376	3.81647	0.0709786
60d	32.5568				23.192				9.36483	3.29754	0.101705
root	27.5999	0.0430204	27.5619	0.00156087	22.2041	0.0177695	22.1952	0.000800602	5.39587	-0.671418	1.59264	1.62541	0.0313147
root	27.5705				22.2068				5.36368	-0.703606	1.62857
root	27.5152				22.1748				5.34043	-0.726855	1.65503
steam	29.0219	0.396931	29.4785	0.0134651	22.5327	0.0916656	22.625	0.00405151	6.48914	0.421848	0.746468	0.590038	0.138326
steam	29.6729				22.7161				6.95685	0.889563	0.539778
steam	29.7408				22.6262				7.1146	1.04731	0.483869
leaf	29.0178	0.0311844	29.0537	0.00107333	22.7696	0.091225	22.7602	0.00400809	6.24818	0.18089	0.882159	0.856232	0.0584016
leaf	29.0732				22.6647				6.40854	0.341252	0.789356
leaf	29.0702				22.8464				6.22382	0.156527	0.897182
flower	28.8114	0.0572262	28.8446	0.00198395	23.1038	0.0095862	23.0955	0.000415068	5.70757	-0.359717	1.28317	1.24759	0.0566195
flower	28.8118				23.0976				5.71419	-0.353099	1.2773
flower	28.9107				23.085				5.82569	-0.241599	1.1823

## Sheet: Sheet2
DGAT1A		DGAT1B		DGAT1C		cytoDGAT		DGAT2a1		DGAT2b1		WS/DGATa6		WS/DGATb2		WS/DGATc1
Mean	Std	Mean	Std	Mean	Std	Mean	Std	Mean	Std	Mean	Std	Mean	Std	Mean	Std	Mean	Std
1.3054	0.0964694	14.6603	1.55569	92.1345	4.6728	4.69318	0.45943	1.94045	0.174868	3.38537	0.141556	2.20346	0.213163	2.89493	0.296623	0.107203	0.00688184
1.01285	0.159385	9.02201	1.24029	58.4775	7.69802	2.82476	0.253496	1.73962	0.176015	2.16636	0.132054	0.610124	0.149207	1.37282	0.187392	0.16359	0.0112728
0.768395	0.101992	3.155	0.997197	77.9497	2.99928	8.02704	0.634975	1.08586	0.205908	0.989543	0.137515	0.261371	0.0477035	1.01087	0.117163	0.128616	0.0126617
1.62172	0.0563002	4.47555	0.683717	25.5036	1.17705	4.80632	0.492343	1.2858	0.120928	0.965882	0.0852199	0.123813	0.0358629	1.23779	0.156866	0.132842	0.00952403
5.21869	0.689574	28.7764	1.77128	70.3541	4.02446	5.23468	0.824541	0.972801	0.0855508	0.759816	0.116266	0.6998	0.173392	1.43856	0.166168	0.101337	0.0149782
6.63928	0.426486	29.7547	1.26831	35.5311	3.48539	2.77945	0.529253	0.957522	0.208102	0.534668	0.0919183	0.0884515	0.034752	1.7891	0.148363	0.0828201	0.0165297
1.97098	0.495049	22.9858	1.0915	83.7968	6.08276	3.42578	0.424255	1.07371	0.10627	0.612419	0.0649466	1.65732	0.322395	0.38251	0.123858	1.62541	0.0313147
0.224871	0.0336683	6.27148	0.994889	105.828	4.75264	2.46746	0.620417	0.217201	0.082984	0.438	0.104026	43.2383	1.2816	6.35707	0.771656	0.590038	0.138326
0.292413	0.0208368	11.5005	0.499549	44.4721	6.339	8.23286	0.475359	0.875601	0.0414391	12.4084	0.855623	38.4829	3.4092	40.5987	3.75445	0.856232	0.0584016
0.385224	0.113177	32.1599	2.03285	30.2693	2.86624	4.18303	0.408657	2.55288	0.104232	5.49309	1.00394	16.9589	1.92476	48.5618	5.71186	1.24759	0.0566195
