# Supplementary material for: Genome-wide identification and expression analysis of diacylglycerol acyltransferase genes in soybean ( Glycine max )
Source: PeerJ journal article supplement (doi:10.7717/peerj.14941), 2023-03-20
Supplement: TabS1.docx [file TabS1.docx]

| **Table S1 Primers for qRT-PCR verification** | | | |
| --- | --- | --- | --- |
| Gene ID | Gene Name | Primer Sequence（5'-3'） | |
| Forward | Reverse |
| Glyma.13G118300 | cytoDGAT | CCCAAGACCCCCATTGTTGA | TCCTCTTTTGAGGAGCAGCG |
| Glyma.13G106100 | DGAT1A | AAGGAAAGTCCGCTCAGCTC | TGACTCTGCAACTGACGGAAA |
| Glyma.17G053300 | DGAT1B | CAAACTTGACTGAAGCTACGGC | AACTGGCATATCCCGTGGAA |
| Glyma.09G065300 | DGAT1C | CGACTCAGATCTCCGACAGC | TTGATGTTGTCGTCGTCGGT |
| Glyma.01G156000 | DGAT2a1 | CCAATGCATGTGGTTGTGGG | CTCCTCGGTGGTTGGTTCTC |
| Glyma.03G243700 | DGAT2b1 | TTGCATTTTGGTGTGTGGCT | TGTGAGGAAGGTCACGTGTT |
| Glyma.09G239600 | WS-DGATa6 | CAATACACGAGGCCCACCTT | TGATTACCAAGTGAGATCAGACAAT |
| Glyma.19G046000 | WS-DGATb2 | TCCTCTCACTGGCATGCTTC | CACAGCCATTTGCTCCACTG |
| Glyma.07G000300 | WS-DGATc1 | AGCTCTGGCCCAGGAAGATA | ATCTCGCAGCCCATTAGGTG |
|  |  |  |  |
